# Supplementary material
Source: publisher site journal article supplement (https://www.spandidos-publications.com/6653/downloadSupplementary)
Supplement: Supplementary file 1 [file downloadSupplementary]

## Sheet: Sheet1
Table SIV. DEGs generated from the TCGA dataset.
id	logFC	AveExpr	t	P.Value	adj.P.Val	B
HMGCS2	-6.2742	-2.309	-11.7827	1.54e-19	2.19e-15	33.8498
ADIPOQ	-6.20903	-2.68014	-11.1779	2.37e-18	1.69e-14	31.2043
ADH1B	-6.65758	-1.66785	-10.8208	1.21e-17	5.74e-14	29.6258
PLIN1	-5.19028	-1.88425	-10.5048	5.17e-17	1.84e-13	28.2206
TGFB1	1.90263	6.89464	10.2746	1.49e-16	3.83e-13	27.1923
GPD1	-5.22388	-0.554001	-10.2575	1.62e-16	3.83e-13	27.1156
GPD1L	-2.45668	3.90057	-10.0428	4.36e-16	8.86e-13	26.1534
SLC27A6	-4.93424	-2.03194	-9.99913	5.34e-16	9.49e-13	25.9571
CRISP3	-8.50683	0.244077	-9.95524	6.54e-16	1.02e-12	25.76
FOXM1	2.51845	5.76378	9.93535	7.18e-16	1.02e-12	25.6706
C9orf152	-4.59222	-2.11806	-9.77947	1.48e-15	1.91e-12	24.9694
NRG2	-4.2596	-1.55951	-9.75019	1.69e-15	2.01e-12	24.8376
CIDEC	-4.43743	-2.81774	-9.6254	3.02e-15	3.3e-12	24.2753
BMP1	1.94752	6.02384	9.57036	3.9e-15	3.96e-12	24.0272
MPC1	-1.75373	3.83945	-9.48065	5.92e-15	5.61e-12	23.6225
ECRG4	-4.4896	-2.26675	-9.4482	6.89e-15	5.84e-12	23.476
PTHLH	4.46972	6.38814	9.44515	6.99e-15	5.84e-12	23.4623
SETMAR	-1.70242	2.48412	-9.39981	8.63e-15	6.81e-12	23.2576
DLK1	-4.99664	-2.74323	-9.35274	1.07e-14	8.03e-12	23.0451
PPP1R1A	-5.0393	-1.82407	-9.24781	1.75e-14	1.19e-11	22.5711
TPX2	2.49076	6.37155	9.24378	1.78e-14	1.19e-11	22.5529
MYBL2	2.67251	5.90132	9.23585	1.85e-14	1.19e-11	22.5171
CEP55	2.57921	5.10593	9.18195	2.38e-14	1.47e-11	22.2735
HOXC6	2.99333	-0.00858321	9.16429	2.58e-14	1.53e-11	22.1937
FAM107A	-4.14843	1.0692	-9.14819	2.78e-14	1.58e-11	22.121
GPRIN1	2.4024	4.03931	9.13521	2.95e-14	1.62e-11	22.0623
CAB39L	-2.01675	2.74944	-9.05362	4.32e-14	2.27e-11	21.6935
TRMT9B	-3.56168	-0.686587	-9.02179	5.01e-14	2.54e-11	21.5497
MMP9	4.34396	6.25879	9.01175	5.25e-14	2.57e-11	21.5043
PLIN4	-4.66801	0.677905	-8.98664	5.9e-14	2.75e-11	21.3908
KIF14	2.74165	3.579	8.97777	6.15e-14	2.75e-11	21.3507
AIM2	4.08388	3.33429	8.97259	6.3e-14	2.75e-11	21.3273
KIF2C	2.32858	4.95943	8.96948	6.39e-14	2.75e-11	21.3132
AURKA	2.06358	4.63132	8.93471	7.51e-14	3.14e-11	21.156
EDN3	-5.32981	-2.58902	-8.88062	9.67e-14	3.92e-11	20.9115
EXO1	2.07777	3.38837	8.84686	1.13e-13	4.46e-11	20.7589
AQP7	-3.79166	-1.86873	-8.83869	1.17e-13	4.51e-11	20.722
MYOC	-4.25609	-3.18478	-8.83117	1.22e-13	4.55e-11	20.688
FSCN1	2.21825	9.16113	8.75498	1.73e-13	6.32e-11	20.3437
NCAPD2	1.2103	6.9031	8.74241	1.84e-13	6.53e-11	20.2868
NDRG2	-2.94386	5.79408	-8.73393	1.91e-13	6.63e-11	20.2485
SPAG5	1.92045	4.73376	8.69958	2.24e-13	7.6e-11	20.0933
SPOCD1	3.29217	1.6643	8.64608	2.88e-13	9.52e-11	19.8516
GPT	-3.791	0.0301241	-8.60425	3.5e-13	1.13e-10	19.6626
PLK1	2.50616	5.51667	8.59534	3.65e-13	1.14e-10	19.6224
DTL	2.00838	4.21278	8.5902	3.73e-13	1.14e-10	19.5992
CDCA5	2.14657	5.03429	8.58746	3.78e-13	1.14e-10	19.5868
KIF4A	2.38667	4.46851	8.57805	3.95e-13	1.17e-10	19.5443
CFTR	-5.21085	-1.76903	-8.57173	4.07e-13	1.18e-10	19.5157
ADAM12	3.76752	4.75164	8.54385	4.63e-13	1.32e-10	19.3899
LAMC2	3.69092	9.30882	8.53195	4.89e-13	1.36e-10	19.3361
COLGALT1	1.39276	7.15826	8.51662	5.26e-13	1.44e-10	19.2669
CLEC3B	-3.22434	0.868526	-8.49689	5.76e-13	1.54e-10	19.1778
MFAP2	2.94448	4.99275	8.46545	6.67e-13	1.75e-10	19.0359
INHBA	4.04233	5.9495	8.42065	8.21e-13	2.12e-10	18.8338
C1QTNF6	2.85135	4.64512	8.41408	8.47e-13	2.15e-10	18.8041
CD276	1.86575	6.82386	8.40351	8.89e-13	2.22e-10	18.7564
SH3BGRL2	-4.09981	3.06717	-8.36958	1.04e-12	2.52e-10	18.6034
BUB1	2.06941	4.60706	8.36674	1.05e-12	2.52e-10	18.5906
LOXL2	3.12765	5.47156	8.36526	1.06e-12	2.52e-10	18.5839
NDE1	1.4172	5.93752	8.34939	1.14e-12	2.66e-10	18.5124
GTSE1	2.1591	3.6864	8.30927	1.38e-12	3.16e-10	18.3315
MKI67	2.41825	7.10925	8.26051	1.73e-12	3.82e-10	18.1118
KLF15	-3.52312	-1.24716	-8.25667	1.76e-12	3.82e-10	18.0945
TLE2	-3.13369	2.07239	-8.25658	1.76e-12	3.82e-10	18.0941
WDHD1	1.66437	4.36628	8.25465	1.77e-12	3.82e-10	18.0854
CENPF	2.15018	5.98174	8.24055	1.89e-12	3.97e-10	18.0219
TTYH3	1.86885	6.91553	8.23842	1.91e-12	3.97e-10	18.0123
PRR11	2.09447	4.6543	8.23494	1.94e-12	3.97e-10	17.9966
DLGAP5	2.40799	4.62215	8.23381	1.95e-12	3.97e-10	17.9915
ARTN	3.36758	2.21124	8.22781	2.01e-12	4.02e-10	17.9645
NETO2	2.00709	4.83609	8.22412	2.04e-12	4.02e-10	17.9479
TK1	1.96731	6.3088	8.2217	2.07e-12	4.02e-10	17.937
CACNB4	-3.80543	-0.891912	-8.21766	2.11e-12	4.05e-10	17.9188
PLIN5	-3.5055	-0.685866	-8.20108	2.27e-12	4.31e-10	17.8441
CIP2A	1.83403	3.6594	8.14464	2.95e-12	5.53e-10	17.5901
CLDN10	-5.715	-1.32643	-8.13863	3.04e-12	5.61e-10	17.563
ACSM3	-2.67657	-0.0288534	-8.13359	3.11e-12	5.67e-10	17.5404
AGFG2	-1.75675	4.02321	-8.12654	3.21e-12	5.78e-10	17.5086
WDR66	2.32184	5.02514	8.11852	3.34e-12	5.91e-10	17.4726
SLC38A7	1.10739	4.87803	8.11655	3.37e-12	5.91e-10	17.4637
FMO2	-5.03198	1.87984	-8.07973	3.99e-12	6.92e-10	17.2981
FAM189A2	-3.89394	0.408614	-8.07537	4.07e-12	6.97e-10	17.2786
DLG2	-3.14286	-0.450571	-8.07227	4.13e-12	6.99e-10	17.2646
NCAPH	1.89994	4.2187	8.04135	4.77e-12	7.88e-10	17.1256
COL13A1	2.17498	1.81902	8.0411	4.77e-12	7.88e-10	17.1245
KIF18B	2.30502	3.907	8.03879	4.82e-12	7.88e-10	17.1141
TGFBI	3.30116	8.87139	8.03372	4.94e-12	7.97e-10	17.0914
ELF4	1.54786	5.91076	8.03136	4.99e-12	7.97e-10	17.0807
PRC1	1.70599	5.85245	8.01934	5.28e-12	8.34e-10	17.0268
ANLN	2.44983	6.17922	7.99883	5.8e-12	9.06e-10	16.9346
ECT2	1.67878	5.62532	7.98482	6.19e-12	9.57e-10	16.8717
PKMYT1	2.37972	4.65916	7.97059	6.61e-12	9.99e-10	16.8078
CA9	5.55175	3.21384	7.96979	6.64e-12	9.99e-10	16.8043
SORBS2	-3.45945	2.30677	-7.96849	6.68e-12	9.99e-10	16.7984
UBE2C	2.28015	5.1132	7.96372	6.83e-12	1.01e-09	16.777
NEK2	2.1861	3.64595	7.95639	7.06e-12	1.03e-09	16.7441
COL4A1	2.74199	8.26344	7.94677	7.38e-12	1.07e-09	16.7009
MMP14	1.60241	8.82193	7.94004	7.62e-12	1.08e-09	16.6707
MYRIP	-3.606	-1.43171	-7.93945	7.64e-12	1.08e-09	16.6681
CENPI	1.90935	2.45863	7.93761	7.7e-12	1.08e-09	16.6598
KIF23	2.07924	4.80053	7.92677	8.1e-12	1.13e-09	16.6112
COL12A1	3.26557	7.87721	7.91598	8.51e-12	1.17e-09	16.5628
RRAGD	-2.70651	3.49393	-7.91478	8.56e-12	1.17e-09	16.5574
FHIT	-2.52935	-0.0933211	-7.91201	8.67e-12	1.17e-09	16.545
SLC25A34	-2.86707	-0.437604	-7.89622	9.32e-12	1.25e-09	16.4742
CENPA	2.25687	2.89467	7.88943	9.62e-12	1.28e-09	16.4438
DEPDC1B	1.98588	3.11397	7.88438	9.85e-12	1.3e-09	16.4211
MMP13	5.57626	4.17391	7.87551	1.03e-11	1.34e-09	16.3814
HADH	-1.25579	5.30628	-7.87262	1.04e-11	1.34e-09	16.3684
E2F7	2.57429	3.31923	7.86698	1.07e-11	1.37e-09	16.3432
IL11	3.69804	1.52221	7.85509	1.13e-11	1.43e-09	16.2899
GNA12	1.3649	6.30476	7.83641	1.23e-11	1.54e-09	16.2062
TF	-5.76946	0.835469	-7.83462	1.24e-11	1.54e-09	16.1982
KIF20A	2.20131	4.92511	7.82153	1.32e-11	1.63e-09	16.1395
THRSP	-4.44129	-2.8659	-7.80725	1.41e-11	1.72e-09	16.0756
NFIX	-1.7493	6.1857	-7.798	1.47e-11	1.77e-09	16.0342
CRYM	-3.97217	-0.619329	-7.79637	1.48e-11	1.77e-09	16.0269
RAD54L	1.8438	2.82761	7.79543	1.48e-11	1.77e-09	16.0227
SERPINH1	2.04234	7.88632	7.79248	1.5e-11	1.77e-09	16.0095
FOXD2	1.76112	-0.119809	7.79167	1.51e-11	1.77e-09	16.0059
FANCI	1.67009	5.43654	7.77414	1.64e-11	1.91e-09	15.9274
HJURP	2.33286	3.68271	7.75713	1.77e-11	2.05e-09	15.8513
SHCBP1	2.08527	3.99195	7.75224	1.81e-11	2.06e-09	15.8295
C16orf89	-4.40229	-2.26452	-7.75215	1.81e-11	2.06e-09	15.8291
CAPN6	-4.82469	-0.652505	-7.74149	1.9e-11	2.15e-09	15.7814
UHRF1	2.10751	4.40163	7.73332	1.98e-11	2.21e-09	15.7449
IQGAP3	2.05799	4.30125	7.71904	2.11e-11	2.34e-09	15.6811
C16orf74	2.21762	3.92719	7.71544	2.15e-11	2.36e-09	15.665
CGNL1	-3.70185	2.26939	-7.70692	2.23e-11	2.44e-09	15.6269
CLSPN	2.23235	3.19072	7.68944	2.42e-11	2.61e-09	15.5488
ITGA5	2.58158	7.04494	7.68885	2.43e-11	2.61e-09	15.5462
NAV1	1.66674	6.746	7.65932	2.78e-11	2.96e-09	15.4143
CLU	-3.3237	6.23594	-7.65846	2.79e-11	2.96e-09	15.4105
PRH2	-4.59335	-3.06353	-7.65296	2.86e-11	3.01e-09	15.3859
CDC6	1.92493	4.59998	7.64733	2.94e-11	3.07e-09	15.3608
FAM3B	-5.64997	0.106533	-7.64463	2.97e-11	3.08e-09	15.3487
KPNA2	1.47873	7.34587	7.64361	2.99e-11	3.08e-09	15.3442
HP	-4.22496	-2.19714	-7.63699	3.08e-11	3.15e-09	15.3147
RPS6KA6	-3.88377	-1.74695	-7.6332	3.13e-11	3.15e-09	15.2977
MMP12	4.00207	4.76231	7.63236	3.14e-11	3.15e-09	15.294
CRBN	-1.11302	3.80493	-7.63219	3.15e-11	3.15e-09	15.2932
CCNB2	1.97693	4.83116	7.61793	3.36e-11	3.34e-09	15.2296
WNT7B	2.67284	5.83954	7.59453	3.74e-11	3.69e-09	15.1253
BCKDHB	-1.49018	2.91061	-7.58635	3.89e-11	3.81e-09	15.0888
MMP1	4.95124	7.21275	7.55808	4.42e-11	4.31e-09	14.9629
PEBP1	-1.09728	7.35098	-7.55115	4.57e-11	4.41e-09	14.932
ASPM	2.25817	4.8706	7.54885	4.61e-11	4.43e-09	14.9218
CDC25C	1.9571	1.95978	7.54264	4.75e-11	4.53e-09	14.8942
HOXD11	4.29204	1.20298	7.53713	4.87e-11	4.59e-09	14.8696
BUB1B	2.12028	4.22263	7.53576	4.9e-11	4.59e-09	14.8635
HOXA10	3.18758	0.58829	7.53411	4.94e-11	4.59e-09	14.8562
ULBP2	2.91643	3.36642	7.53402	4.94e-11	4.59e-09	14.8558
HOXA1	2.71763	1.74911	7.52754	5.09e-11	4.7e-09	14.827
BIRC5	2.11856	5.56752	7.52026	5.26e-11	4.82e-09	14.7946
CDCA3	1.89573	3.64735	7.51403	5.41e-11	4.93e-09	14.7668
MCM2	1.65382	6.3634	7.51057	5.5e-11	4.98e-09	14.7514
TFAP2B	-4.07792	-2.92387	-7.49644	5.87e-11	5.28e-09	14.6886
VSIG2	-3.85179	-0.708887	-7.4896	6.06e-11	5.41e-09	14.6582
PNPLA7	-2.4266	1.1995	-7.48142	6.29e-11	5.56e-09	14.6218
CKAP2L	2.12931	4.17847	7.48089	6.3e-11	5.56e-09	14.6195
GJC1	2.81238	2.87405	7.46206	6.87e-11	6.02e-09	14.5358
ERFE	2.98164	0.268882	7.46087	6.91e-11	6.02e-09	14.5305
TRIP13	2.10572	4.41044	7.45171	7.2e-11	6.24e-09	14.4898
HSD17B6	1.82635	0.837219	7.44303	7.5e-11	6.46e-09	14.4512
DPF1	2.93806	1.14955	7.43994	7.6e-11	6.5e-09	14.4375
PTGFRN	1.3438	8.27812	7.43901	7.63e-11	6.5e-09	14.4334
KIF18A	1.99843	3.18059	7.43501	7.78e-11	6.58e-09	14.4156
MTFR1L	-1.06705	4.43611	-7.43263	7.86e-11	6.61e-09	14.405
TOP2A	2.11501	6.80721	7.43131	7.91e-11	6.61e-09	14.3992
NOSTRIN	-1.96764	0.701849	-7.4234	8.2e-11	6.81e-09	14.3641
ZNF114	3.33424	1.25876	7.41632	8.47e-11	7e-09	14.3326
ADAMTS2	3.30065	5.44038	7.39037	9.54e-11	7.83e-09	14.2175
FAM3D	-5.49648	1.67999	-7.38202	9.91e-11	8.05e-09	14.1805
SPATA18	-2.17772	2.01511	-7.38049	9.98e-11	8.05e-09	14.1737
STATH	-7.43622	-1.53061	-7.38009	1e-10	8.05e-09	14.1719
ATAD2	1.65664	5.59443	7.37953	1e-10	8.05e-09	14.1695
ZBTB16	-3.89967	-1.23176	-7.34823	1.16e-10	9.18e-09	14.0307
PEBP4	-3.71448	-2.40875	-7.34448	1.18e-10	9.29e-09	14.0141
CDC20	2.23376	6.08407	7.34302	1.18e-10	9.3e-09	14.0076
COL1A1	3.88749	11.1435	7.34113	1.19e-10	9.33e-09	13.9993
MELK	2.31219	4.50317	7.33488	1.23e-10	9.54e-09	13.9716
YEATS2	1.27489	5.81622	7.33338	1.24e-10	9.56e-09	13.965
BOC	-2.36836	3.41329	-7.3321	1.24e-10	9.56e-09	13.9593
TROAP	2.07995	3.7231	7.33057	1.25e-10	9.58e-09	13.9525
MCM10	1.9051	3.5011	7.32247	1.3e-10	9.88e-09	13.9166
DEPTOR	-3.18912	2.25808	-7.32047	1.31e-10	9.92e-09	13.9078
KLF7	1.68457	5.63764	7.29756	1.46e-10	1.1e-08	13.8064
SLC2A4	-3.59002	-0.43699	-7.28685	1.53e-10	1.14e-08	13.759
SLC4A4	-3.40559	-1.13467	-7.2852	1.54e-10	1.15e-08	13.7517
RAD51	1.69557	3.50488	7.28282	1.56e-10	1.15e-08	13.7412
C7	-5.13519	-0.807309	-7.27487	1.62e-10	1.19e-08	13.706
COL5A2	3.34061	7.50408	7.27301	1.63e-10	1.19e-08	13.6979
TRPV6	-3.79821	-1.04425	-7.26386	1.7e-10	1.24e-08	13.6574
PLP1	-3.91597	-1.43811	-7.25876	1.74e-10	1.26e-08	13.6349
PDHB	-1.01322	5.24652	-7.25772	1.75e-10	1.26e-08	13.6303
CIPC	-1.09798	4.50674	-7.25121	1.8e-10	1.29e-08	13.6015
KIF26B	2.46836	3.95123	7.24522	1.85e-10	1.32e-08	13.575
NCAPG	1.9675	4.37169	7.24042	1.89e-10	1.34e-08	13.5538
ACOX2	-2.67113	0.321613	-7.24013	1.89e-10	1.34e-08	13.5526
LIMK1	1.05187	6.12708	7.2344	1.94e-10	1.36e-08	13.5272
COL5A1	3.25879	8.02458	7.23433	1.94e-10	1.36e-08	13.5269
ACADVL	-1.19153	7.35553	-7.23255	1.96e-10	1.36e-08	13.5191
NR3C2	-3.544	-0.145315	-7.22815	2e-10	1.38e-08	13.4996
IGF2BP2	2.80383	5.66814	7.22782	2e-10	1.38e-08	13.4982
CHST9	-5.16232	-1.83669	-7.21569	2.12e-10	1.45e-08	13.4447
EME1	1.7351	1.59584	7.2135	2.14e-10	1.46e-08	13.435
HMGA2	4.90936	3.30814	7.20963	2.17e-10	1.48e-08	13.4179
CDCA8	2.02734	4.52386	7.20371	2.23e-10	1.51e-08	13.3918
ISOC1	-1.1534	3.92801	-7.20018	2.27e-10	1.53e-08	13.3762
STON2	1.68288	5.90634	7.19294	2.35e-10	1.57e-08	13.3443
SLC36A1	1.19911	4.58581	7.19226	2.35e-10	1.57e-08	13.3413
FZD2	1.81934	2.11849	7.1913	2.36e-10	1.57e-08	13.337
SH2D2A	2.14435	2.87697	7.18745	2.41e-10	1.59e-08	13.3201
ITM2A	-2.83545	2.70968	-7.18116	2.48e-10	1.63e-08	13.2923
CENPO	1.1467	3.63529	7.17156	2.59e-10	1.69e-08	13.25
PLA2G2A	-5.48158	0.76411	-7.16349	2.68e-10	1.75e-08	13.2145
SLC16A3	1.72239	6.31885	7.15069	2.84e-10	1.84e-08	13.1581
SLC2A1	2.48238	9.74711	7.14765	2.88e-10	1.86e-08	13.1447
GREM2	-3.68897	-1.13531	-7.14582	2.91e-10	1.87e-08	13.1366
HASPIN	1.61207	2.09611	7.1367	3.03e-10	1.94e-08	13.0965
KNL1	2.01342	4.11749	7.1324	3.09e-10	1.97e-08	13.0775
TSPAN8	-4.38394	-1.73275	-7.1228	3.23e-10	2.04e-08	13.0353
SCGB2A2	-3.31128	-3.61026	-7.12222	3.23e-10	2.04e-08	13.0327
PDK4	-3.76179	1.95971	-7.12193	3.24e-10	2.04e-08	13.0315
EXT1	1.29093	6.88028	7.11806	3.3e-10	2.06e-08	13.0145
CCN4	3.21027	2.88213	7.11014	3.42e-10	2.13e-08	12.9796
CYP4B1	-5.24083	0.683406	-7.10689	3.47e-10	2.15e-08	12.9653
ARHGAP11A	1.73306	4.69877	7.10459	3.5e-10	2.17e-08	12.9552
CENPE	2.11287	4.1576	7.10234	3.54e-10	2.18e-08	12.9453
ISG15	3.31782	6.65596	7.09961	3.58e-10	2.2e-08	12.9333
FABP7	-4.06724	-2.65512	-7.0938	3.68e-10	2.24e-08	12.9078
SUCLG2	-1.06574	5.11623	-7.09236	3.7e-10	2.25e-08	12.9014
HAPLN1	3.00918	0.608964	7.08445	3.84e-10	2.32e-08	12.8667
ENPP3	-3.62241	-2.21947	-7.08397	3.85e-10	2.32e-08	12.8646
FGD6	1.37337	5.14102	7.07273	4.05e-10	2.41e-08	12.8152
LTF	-7.31637	1.8389	-7.07232	4.06e-10	2.41e-08	12.8134
PLAC1	3.50983	-0.149558	7.0595	4.3e-10	2.54e-08	12.7571
CHAD	-3.47602	-1.75621	-7.05893	4.31e-10	2.54e-08	12.7546
CDKN3	1.64381	3.71916	7.05311	4.42e-10	2.6e-08	12.729
RORC	-3.70868	1.14176	-7.05154	4.46e-10	2.61e-08	12.7221
CHPT1	-2.23935	3.27989	-7.04311	4.63e-10	2.7e-08	12.6851
STC2	3.14496	3.64725	7.03535	4.8e-10	2.78e-08	12.6511
SELENBP1	-3.15465	2.63744	-7.02514	5.02e-10	2.9e-08	12.6063
SMDT1	-1.24559	4.38219	-7.01919	5.16e-10	2.97e-08	12.5802
KIF11	1.68504	5.36367	7.01845	5.18e-10	2.97e-08	12.5769
BNC1	2.87377	6.60196	7.01233	5.32e-10	3.04e-08	12.5501
AGRN	1.55957	8.6591	7.00789	5.43e-10	3.09e-08	12.5307
CCNA2	2.04923	5.01218	7.00397	5.53e-10	3.13e-08	12.5135
PTK7	1.50089	7.3722	6.99958	5.64e-10	3.18e-08	12.4942
TCEAL2	-3.53295	-2.00961	-6.99313	5.8e-10	3.26e-08	12.466
XPR1	1.10663	6.21187	6.98693	5.97e-10	3.34e-08	12.4388
IFI27	2.81197	8.84923	6.96721	6.53e-10	3.64e-08	12.3525
LRRC26	-3.59788	-3.15996	-6.96481	6.6e-10	3.66e-08	12.342
USB1	1.24593	6.34879	6.96338	6.64e-10	3.67e-08	12.3357
SERPINE1	2.92279	7.49972	6.95362	6.94e-10	3.82e-08	12.293
TMEM184B	1.09152	6.60802	6.94781	7.12e-10	3.91e-08	12.2676
NDC80	1.97808	3.88611	6.9425	7.29e-10	3.99e-08	12.2444
MGAM2	-3.57664	-3.17578	-6.93979	7.38e-10	4.02e-08	12.2325
ETFDH	-1.34013	4.07951	-6.93912	7.41e-10	4.02e-08	12.2296
AQP5	-5.77878	-0.208251	-6.93369	7.59e-10	4.1e-08	12.2059
ALG1L	2.4128	2.53115	6.92946	7.74e-10	4.16e-08	12.1874
ERCC6L	1.88193	2.62117	6.92521	7.89e-10	4.22e-08	12.1688
HOXC13	3.71917	2.51185	6.92483	7.9e-10	4.22e-08	12.1672
DNMT3B	2.21272	3.01979	6.92057	8.05e-10	4.27e-08	12.1485
CDC45	1.96779	3.84531	6.92015	8.07e-10	4.27e-08	12.1467
GNG7	-2.53933	0.797625	-6.91994	8.08e-10	4.27e-08	12.1458
CDCA2	2.04844	3.4952	6.91743	8.17e-10	4.3e-08	12.1348
MYO10	1.5391	6.90493	6.91244	8.35e-10	4.38e-08	12.113
GMDS	-1.51242	4.26125	-6.91019	8.44e-10	4.41e-08	12.1032
GALNT16	-3.56592	-0.415794	-6.90614	8.59e-10	4.47e-08	12.0855
ZG16B	-6.58596	1.23783	-6.89627	8.98e-10	4.66e-08	12.0425
HOXC9	2.83155	-0.39336	6.89084	9.21e-10	4.75e-08	12.0187
PRIM2	1.20587	3.79155	6.89041	9.23e-10	4.75e-08	12.0168
TTK	1.88314	4.00135	6.88949	9.26e-10	4.75e-08	12.0129
SORBS1	-2.76219	2.78663	-6.8874	9.35e-10	4.78e-08	12.0037
CDT1	1.69962	4.53056	6.87956	9.69e-10	4.93e-08	11.9695
NUCB2	-1.59466	5.34986	-6.878	9.76e-10	4.95e-08	11.9627
ACAD8	-1.33754	3.53473	-6.87159	1e-09	5.08e-08	11.9348
CHRM1	-3.92278	-2.8008	-6.86133	1.05e-09	5.3e-08	11.89
SKA1	1.96011	3.06948	6.8575	1.07e-09	5.37e-08	11.8733
SLC16A1	1.88257	7.29942	6.85343	1.09e-09	5.45e-08	11.8556
MRGBP	1.17678	4.64198	6.85064	1.1e-09	5.5e-08	11.8434
PCCA	-1.34397	3.40571	-6.84586	1.13e-09	5.6e-08	11.8226
TIMELESS	1.18218	5.54433	6.84482	1.13e-09	5.61e-08	11.8181
ORC1	1.89347	3.43515	6.83844	1.17e-09	5.75e-08	11.7903
PEG3	-3.58828	-0.319499	-6.83783	1.17e-09	5.75e-08	11.7876
SNAI2	1.43618	5.96171	6.83362	1.19e-09	5.84e-08	11.7693
PPP1R1B	-5.55078	-0.806184	-6.83274	1.2e-09	5.84e-08	11.7655
MTFR2	1.76455	2.09856	6.83079	1.21e-09	5.87e-08	11.757
UBXN7	1.04236	5.97279	6.83003	1.21e-09	5.87e-08	11.7537
COL4A2	2.35713	8.46811	6.81856	1.27e-09	6.16e-08	11.7037
TEDC2	1.73434	2.39382	6.81655	1.29e-09	6.2e-08	11.695
KCTD6	-1.24861	1.76147	-6.80241	1.37e-09	6.56e-08	11.6335
CDH19	-3.71537	-1.84073	-6.79969	1.39e-09	6.59e-08	11.6217
AURKB	2.09033	4.30564	6.79686	1.4e-09	6.63e-08	11.6094
CDCA4	1.46017	5.5191	6.7951	1.42e-09	6.66e-08	11.6017
PPP1R9A	-3.81461	-1.58616	-6.76649	1.61e-09	7.55e-08	11.4774
ERBB4	-3.62682	-2.44951	-6.76588	1.61e-09	7.55e-08	11.4747
CDK1	1.76232	5.23125	6.75406	1.7e-09	7.91e-08	11.4234
CIT	1.48776	4.69456	6.74534	1.77e-09	8.19e-08	11.3856
SLC38A3	-3.48923	-1.03355	-6.7421	1.8e-09	8.27e-08	11.3715
LPIN1	-1.72216	4.12158	-6.7418	1.8e-09	8.27e-08	11.3702
COL7A1	2.20756	7.79371	6.73719	1.84e-09	8.42e-08	11.3502
ZNF844	-2.64616	1.3269	-6.73126	1.89e-09	8.6e-08	11.3245
PIP	-6.03876	-2.4739	-6.73097	1.89e-09	8.6e-08	11.3233
ABCA8	-3.80515	0.410773	-6.7251	1.94e-09	8.8e-08	11.2978
ZIC2	3.73172	1.37672	6.72407	1.95e-09	8.81e-08	11.2934
AOX1	-2.70864	1.62739	-6.7224	1.96e-09	8.85e-08	11.2861
RPL15	-1.01718	8.77933	-6.71833	2e-09	8.98e-08	11.2685
GADD45B	-1.78886	4.83621	-6.71469	2.03e-09	9.1e-08	11.2527
LAMA3	2.52694	8.03316	6.71055	2.07e-09	9.24e-08	11.2347
PLXNA1	1.21007	7.32747	6.70673	2.1e-09	9.37e-08	11.2182
ANGPTL1	-3.58045	-0.366886	-6.69729	2.19e-09	9.75e-08	11.1773
TMEM220	-2.07433	0.801146	-6.67499	2.42e-09	1.07e-07	11.0809
TM4SF19	2.79462	1.91111	6.67297	2.45e-09	1.08e-07	11.0721
ASF1B	1.77375	4.53092	6.67269	2.45e-09	1.08e-07	11.0709
PLAC9	-2.47342	0.525207	-6.67133	2.46e-09	1.08e-07	11.065
KNTC1	1.2831	4.29692	6.67126	2.47e-09	1.08e-07	11.0647
BMP3	-3.86838	-2.54265	-6.66712	2.51e-09	1.09e-07	11.0468
RACGAP1	1.45444	5.61903	6.66476	2.54e-09	1.1e-07	11.0366
BEX4	-2.46091	2.67563	-6.66092	2.58e-09	1.12e-07	11.02
SPATA6	-2.19662	0.672699	-6.65933	2.6e-09	1.12e-07	11.0131
ESRRG	-3.63229	-1.8192	-6.64483	2.77e-09	1.19e-07	10.9505
TESC	-2.48782	0.0284027	-6.63986	2.84e-09	1.22e-07	10.929
MMP11	4.09478	4.6191	6.63921	2.84e-09	1.22e-07	10.9262
CCNF	1.52392	4.76414	6.61869	3.12e-09	1.33e-07	10.8376
CDH24	1.49196	3.26756	6.60479	3.32e-09	1.41e-07	10.7777
UBE2S	1.5497	4.76575	6.60129	3.37e-09	1.42e-07	10.7626
METTL7A	-2.9421	4.15194	-6.595	3.46e-09	1.46e-07	10.7355
FAM72B	1.85852	0.14479	6.57862	3.73e-09	1.57e-07	10.6649
AUNIP	1.55733	2.1552	6.57409	3.8e-09	1.59e-07	10.6454
BST2	2.74482	6.99663	6.57372	3.81e-09	1.59e-07	10.6438
RAB31	1.54334	7.24017	6.57307	3.82e-09	1.59e-07	10.641
PCSK9	3.41262	4.3917	6.56958	3.88e-09	1.61e-07	10.626
RNF125	-1.54645	1.58465	-6.56523	3.95e-09	1.64e-07	10.6073
TACC3	1.58917	5.73448	6.56208	4.01e-09	1.66e-07	10.5937
POLQ	2.08363	3.11472	6.55932	4.06e-09	1.67e-07	10.5818
MYO1B	1.88913	7.79011	6.55809	4.08e-09	1.68e-07	10.5766
IGF2BP3	4.1638	2.59196	6.55757	4.09e-09	1.68e-07	10.5743
TPBG	1.38207	6.12098	6.55619	4.12e-09	1.68e-07	10.5684
STIL	1.52857	3.8855	6.55494	4.14e-09	1.68e-07	10.563
FANCA	1.56993	3.48244	6.55481	4.14e-09	1.68e-07	10.5624
ID4	-2.39877	2.8118	-6.55179	4.2e-09	1.7e-07	10.5494
ADAMTS12	3.39162	3.60297	6.5505	4.22e-09	1.7e-07	10.5439
SMR3B	-6.47754	-2.83491	-6.54641	4.3e-09	1.73e-07	10.5263
TTYH1	-2.5111	-0.49301	-6.54302	4.36e-09	1.75e-07	10.5117
NTRK3	-3.51716	-1.04699	-6.54091	4.41e-09	1.76e-07	10.5026
SMARCD3	-2.2131	2.29101	-6.53487	4.53e-09	1.81e-07	10.4767
ITGB4	1.59719	9.65371	6.53269	4.57e-09	1.82e-07	10.4674
IRAK1BP1	-1.69399	1.01913	-6.53191	4.58e-09	1.82e-07	10.464
MSRA	-1.37606	2.43182	-6.5208	4.82e-09	1.9e-07	10.4163
PLAU	2.31902	7.51771	6.5196	4.84e-09	1.9e-07	10.4111
P4HA2	1.39089	6.40995	6.51953	4.84e-09	1.9e-07	10.4108
TREM1	2.69128	2.54398	6.51713	4.9e-09	1.92e-07	10.4005
SLC25A20	-1.26662	2.908	-6.51025	5.05e-09	1.97e-07	10.371
ACADSB	-1.66781	3.44814	-6.49931	5.3e-09	2.06e-07	10.324
TENM2	3.02484	6.93342	6.49676	5.36e-09	2.08e-07	10.3131
LAMB3	2.22738	9.27999	6.49041	5.51e-09	2.13e-07	10.2858
HMMR	1.88011	3.87862	6.48909	5.54e-09	2.13e-07	10.2802
CRTAC1	-3.38319	0.00320004	-6.48879	5.55e-09	2.13e-07	10.2789
CGAS	1.60241	4.15602	6.48862	5.56e-09	2.13e-07	10.2782
MAPT	-3.29713	0.861639	-6.48724	5.59e-09	2.14e-07	10.2723
FNDC5	-3.35149	-0.704223	-6.47406	5.93e-09	2.26e-07	10.2157
JAG1	1.51485	8.23901	6.47222	5.97e-09	2.28e-07	10.2079
CLDN11	-2.66924	0.0776201	-6.46668	6.12e-09	2.33e-07	10.1841
MYZAP	-2.85029	0.501416	-6.45871	6.34e-09	2.4e-07	10.15
CHST15	1.22961	5.41956	6.45796	6.36e-09	2.41e-07	10.1468
HOXD9	1.82084	1.67582	6.45417	6.47e-09	2.43e-07	10.1306
GSDME	2.19861	4.84484	6.45287	6.51e-09	2.44e-07	10.125
TICRR	1.94491	3.60513	6.45063	6.57e-09	2.46e-07	10.1155
GINS1	1.52237	4.21974	6.44521	6.73e-09	2.51e-07	10.0922
COL10A1	4.81699	2.96086	6.4424	6.82e-09	2.54e-07	10.0802
RAD51AP1	1.41271	3.0331	6.43499	7.04e-09	2.61e-07	10.0485
PDE8B	-1.4534	1.65296	-6.43412	7.07e-09	2.62e-07	10.0448
CIRBP	-1.10781	6.53209	-6.42887	7.24e-09	2.67e-07	10.0224
TFF3	-4.48625	0.0314754	-6.42365	7.41e-09	2.73e-07	10.0001
PRB4	-2.73127	-3.7713	-6.41956	7.54e-09	2.77e-07	9.98258
CLYBL	-1.97179	1.66523	-6.41731	7.62e-09	2.79e-07	9.97295
HLF	-3.66584	1.89156	-6.40886	7.91e-09	2.89e-07	9.93686
CHEK1	1.33304	4.21575	6.40425	8.07e-09	2.94e-07	9.9172
DCBLD1	1.78635	4.95813	6.40147	8.17e-09	2.97e-07	9.90532
ATP6V0A4	-4.31141	0.531301	-6.39633	8.35e-09	3.03e-07	9.8834
ALDH9A1	-1.35682	6.43323	-6.39601	8.37e-09	3.03e-07	9.882
CHST11	1.92507	5.29718	6.38562	8.76e-09	3.16e-07	9.83769
UBL3	-1.28566	5.11197	-6.38111	8.94e-09	3.2e-07	9.81843
ADAM8	1.96117	4.71996	6.37476	9.19e-09	3.28e-07	9.79139
DEPDC1	1.92816	3.71506	6.37337	9.25e-09	3.29e-07	9.78544
DOCK3	-1.97662	0.139348	-6.36525	9.58e-09	3.4e-07	9.75084
TONSL	1.48697	4.40794	6.36421	9.63e-09	3.41e-07	9.74642
CCNE1	1.45912	3.03616	6.36143	9.74e-09	3.44e-07	9.73459
RMI2	1.61141	3.78659	6.36137	9.75e-09	3.44e-07	9.73432
ARHGEF10L	-1.57317	5.05535	-6.35642	9.96e-09	3.5e-07	9.71322
ETFRF1	-1.11982	3.05502	-6.35544	1e-08	3.51e-07	9.70905
EFNB1	1.5334	7.45417	6.34684	1.04e-08	3.64e-07	9.67244
MINDY1	-1.33218	3.96944	-6.34516	1.05e-08	3.66e-07	9.6653
CPEB3	-1.5819	2.52064	-6.34351	1.05e-08	3.67e-07	9.65829
TMEM213	-4.42719	-2.82061	-6.34107	1.07e-08	3.7e-07	9.64788
SHOX2	2.40898	1.46936	6.33896	1.08e-08	3.72e-07	9.63891
CXCL13	3.59608	3.14097	6.33724	1.08e-08	3.74e-07	9.63158
NUSAP1	1.66851	5.37681	6.33493	1.1e-08	3.77e-07	9.62176
KIFC1	1.80421	4.97058	6.32924	1.12e-08	3.85e-07	9.59755
EHD2	1.20678	7.77537	6.32532	1.14e-08	3.9e-07	9.58088
CENPN	1.17093	3.97427	6.32517	1.14e-08	3.9e-07	9.58025
BPIFA2	-3.04556	-3.70679	-6.32321	1.15e-08	3.93e-07	9.57194
CFD	-2.27261	3.4346	-6.32161	1.16e-08	3.95e-07	9.56512
ORC6	1.66877	2.95526	6.31839	1.18e-08	3.99e-07	9.55145
GPX3	-2.84833	5.59713	-6.31552	1.19e-08	4.04e-07	9.53926
TRAM2	1.52159	5.39113	6.31489	1.2e-08	4.04e-07	9.53658
TMEM132A	1.55749	6.36497	6.3014	1.27e-08	4.27e-07	9.47929
GALNT2	1.04902	7.17922	6.29537	1.3e-08	4.38e-07	9.45367
CLDN8	-4.68725	-1.27678	-6.28957	1.34e-08	4.47e-07	9.42904
FAM149A	-2.58695	-0.00647111	-6.28944	1.34e-08	4.47e-07	9.42849
CCNB1	1.6893	6.00932	6.28744	1.35e-08	4.5e-07	9.42003
HOXD10	3.59888	2.02103	6.28327	1.37e-08	4.57e-07	9.40235
FANCB	1.42021	0.810323	6.28101	1.39e-08	4.61e-07	9.39276
ITGA6	1.93558	9.52708	6.2802	1.39e-08	4.61e-07	9.38931
FAM72A	1.44737	-0.166086	6.2783	1.4e-08	4.64e-07	9.38123
LRRC2	-3.66106	-1.3128	-6.27506	1.42e-08	4.7e-07	9.36752
PRRT3	-1.34977	0.904323	-6.27146	1.45e-08	4.75e-07	9.35226
ABHD5	-1.3597	4.24282	-6.25945	1.53e-08	4.97e-07	9.30135
ICA1	-2.49507	1.33457	-6.2505	1.59e-08	5.14e-07	9.26346
MTBP	1.36601	2.62208	6.24763	1.61e-08	5.19e-07	9.2513
ATP2B2	-3.11608	-1.91549	-6.24023	1.66e-08	5.35e-07	9.21998
PI16	-4.54386	-0.514561	-6.22892	1.74e-08	5.61e-07	9.17214
ZNF677	-2.21891	0.419112	-6.21843	1.83e-08	5.86e-07	9.1278
TIMP4	-3.05485	-1.19488	-6.21512	1.85e-08	5.93e-07	9.11384
SVIP	-2.68757	1.60201	-6.21152	1.88e-08	6.01e-07	9.09861
GNGT1	3.13688	-0.0896698	6.20908	1.9e-08	6.06e-07	9.0883
COL5A3	2.16176	5.77716	6.20611	1.93e-08	6.12e-07	9.07576
MCM4	1.1594	7.15736	6.19954	1.98e-08	6.27e-07	9.04803
HELZ2	1.66668	6.64563	6.19789	2e-08	6.31e-07	9.04105
CHRDL1	-4.44504	-0.0556344	-6.19304	2.04e-08	6.43e-07	9.0206
FOXD1	2.68708	1.86401	6.19126	2.06e-08	6.46e-07	9.01308
ADH1C	-4.50829	-1.71751	-6.19004	2.07e-08	6.48e-07	9.0079
TNFAIP8L1	1.15709	4.4358	6.18882	2.08e-08	6.5e-07	9.00277
TUBB3	2.2079	2.08494	6.18824	2.08e-08	6.5e-07	9.00035
E2F1	1.39901	3.5808	6.18611	2.1e-08	6.55e-07	8.99133
VAV2	1.58303	5.84861	6.17513	2.21e-08	6.86e-07	8.94505
ZWINT	1.42808	4.9652	6.17461	2.21e-08	6.86e-07	8.94285
HOXC11	3.38026	0.198039	6.17145	2.24e-08	6.94e-07	8.92955
ZNF626	-2.47373	-0.0433471	-6.16908	2.26e-08	6.99e-07	8.91956
SKA3	1.74488	3.32037	6.16876	2.27e-08	6.99e-07	8.9182
BRCA1	1.20784	4.22601	6.16671	2.29e-08	7.04e-07	8.90954
HOXC8	2.65152	-0.826162	6.16128	2.34e-08	7.18e-07	8.88668
RAC2	1.68656	5.70903	6.15755	2.38e-08	7.28e-07	8.87097
ACKR1	-3.64973	1.95601	-6.15694	2.39e-08	7.28e-07	8.86839
APOD	-3.46001	3.1649	-6.15109	2.45e-08	7.45e-07	8.8438
GTF2IRD2B	-1.63886	0.279082	-6.15014	2.46e-08	7.47e-07	8.83978
SNX10	1.75201	3.51939	6.14897	2.47e-08	7.49e-07	8.83484
FERMT1	2.06037	6.96013	6.14742	2.49e-08	7.51e-07	8.82832
CTHRC1	3.02289	4.35557	6.14591	2.5e-08	7.54e-07	8.82199
ATP8B3	1.70084	1.22604	6.14242	2.54e-08	7.63e-07	8.8073
MAGIX	-1.41875	0.82325	-6.1422	2.55e-08	7.63e-07	8.80635
MICAL2	1.77612	5.80584	6.13623	2.61e-08	7.82e-07	8.78127
COL27A1	1.60379	5.14426	6.1347	2.63e-08	7.85e-07	8.77482
XRCC2	1.63354	2.067	6.13401	2.64e-08	7.86e-07	8.77193
NEMP1	1.20942	4.42898	6.13324	2.65e-08	7.87e-07	8.76866
PPARG	-3.08163	0.810164	-6.13259	2.65e-08	7.88e-07	8.76593
PLK4	1.44498	3.55329	6.12977	2.69e-08	7.96e-07	8.75409
DIAPH3	1.55324	3.62701	6.12931	2.69e-08	7.96e-07	8.75215
EIF2AK2	1.22573	6.5399	6.12739	2.72e-08	8.01e-07	8.74409
SLC16A11	-2.32893	-0.917308	-6.12546	2.74e-08	8.06e-07	8.73598
BORA	1.24288	2.71892	6.12126	2.79e-08	8.19e-07	8.71831
MAGI1	-1.43181	3.69196	-6.1205	2.8e-08	8.2e-07	8.71514
NUF2	1.69519	3.16182	6.11552	2.86e-08	8.36e-07	8.69423
ACADM	-1.20471	4.87973	-6.11402	2.88e-08	8.4e-07	8.6879
ITPR3	1.43146	7.39154	6.10892	2.94e-08	8.57e-07	8.6665
CHADL	-1.85902	0.631386	-6.10088	3.05e-08	8.86e-07	8.63273
SESN1	-1.21628	3.814	-6.09926	3.07e-08	8.9e-07	8.62594
LMNB2	1.30083	7.26855	6.09676	3.1e-08	8.98e-07	8.61546
PRADC1	-1.24459	3.55086	-6.09536	3.12e-08	9.01e-07	8.60958
ZNF132	-1.23572	0.71246	-6.09228	3.16e-08	9.12e-07	8.59667
CNGB1	4.05412	2.87335	6.09124	3.18e-08	9.14e-07	8.5923
RRM2	1.92725	6.18098	6.09011	3.19e-08	9.17e-07	8.58755
ZIC5	3.81874	0.377623	6.08955	3.2e-08	9.17e-07	8.58521
RNF150	-2.88545	1.41989	-6.0861	3.25e-08	9.29e-07	8.57076
TACR1	-3.08517	-1.16109	-6.08338	3.29e-08	9.38e-07	8.55935
SPC25	1.55861	2.56318	6.08094	3.32e-08	9.45e-07	8.54913
PGM5	-2.7883	0.515755	-6.08026	3.33e-08	9.45e-07	8.54627
GPT2	-1.72966	5.61589	-6.08025	3.33e-08	9.45e-07	8.54622
C1orf112	1.0226	2.87049	6.07547	3.4e-08	9.63e-07	8.5262
PRR4	-4.12874	-0.889727	-6.07191	3.46e-08	9.75e-07	8.51129
LPCAT1	1.52978	5.91357	6.06783	3.52e-08	9.9e-07	8.49418
FOXF2	2.05808	2.26642	6.06549	3.55e-08	9.98e-07	8.48439
S1PR5	1.80942	3.72268	6.06078	3.63e-08	1.01e-06	8.46469
GATM	-2.72706	3.11513	-6.06019	3.64e-08	1.02e-06	8.4622
BICD1	1.60375	3.59657	6.05698	3.69e-08	1.03e-06	8.44876
HEMK1	-1.00545	3.1651	-6.05221	3.76e-08	1.04e-06	8.42883
COL3A1	3.31039	10.4543	6.04787	3.83e-08	1.06e-06	8.41067
PPARGC1A	-3.43024	0.663745	-6.04467	3.89e-08	1.07e-06	8.39728
RNF180	-2.39229	-0.063624	-6.04443	3.89e-08	1.07e-06	8.39627
PRB3	-3.33412	-2.17374	-6.03786	4e-08	1.1e-06	8.36879
GPR176	2.41806	4.07314	6.03516	4.05e-08	1.11e-06	8.3575
FOXO4	-1.14662	3.59838	-6.02883	4.16e-08	1.14e-06	8.33108
P3H1	1.53285	5.01623	6.02237	4.28e-08	1.17e-06	8.30408
KCNJ16	-3.11958	-3.0202	-6.0218	4.29e-08	1.17e-06	8.30169
FMNL3	1.19584	4.88293	6.02026	4.32e-08	1.17e-06	8.29526
WNT2	3.55353	0.960771	6.0202	4.32e-08	1.17e-06	8.29504
HOXD13	4.06077	0.387887	6.01444	4.43e-08	1.2e-06	8.27098
GRIN2D	3.02601	2.36985	6.01106	4.5e-08	1.22e-06	8.25686
KIF3C	1.57514	4.01682	6.01048	4.51e-08	1.22e-06	8.25446
KCNB1	-3.09448	-1.93192	-6.00733	4.57e-08	1.23e-06	8.2413
NICN1	-1.16372	2.50108	-6.00642	4.59e-08	1.23e-06	8.23751
PLEC	1.21611	10.1863	5.99316	4.86e-08	1.3e-06	8.18225
FKBP9	1.05845	7.00276	5.99143	4.89e-08	1.31e-06	8.17502
SLC25A23	-1.71477	5.21212	-5.99143	4.89e-08	1.31e-06	8.17501
TGFBR3	-2.50724	3.26914	-5.99081	4.91e-08	1.31e-06	8.17242
SLC7A5	1.89363	9.1067	5.98345	5.07e-08	1.35e-06	8.14177
MT-ND6	-1.71178	8.58213	-5.96948	5.38e-08	1.43e-06	8.08361
PRR15L	-3.24359	0.0668723	-5.96806	5.41e-08	1.43e-06	8.0777
C18orf54	1.35982	2.35158	5.96535	5.48e-08	1.45e-06	8.06643
PARP14	1.6001	6.81193	5.96076	5.59e-08	1.47e-06	8.04733
ALDH2	-1.50196	6.49762	-5.95936	5.62e-08	1.48e-06	8.04153
PLAUR	1.76724	5.60702	5.95762	5.66e-08	1.48e-06	8.03429
LAMA5	1.01956	7.51433	5.95636	5.69e-08	1.49e-06	8.02904
GLYATL2	-3.73991	-1.91458	-5.95469	5.74e-08	1.5e-06	8.02209
CTSV	2.13538	5.76432	5.95417	5.75e-08	1.5e-06	8.01994
PDPN	1.88798	6.4972	5.95254	5.79e-08	1.5e-06	8.01314
ECHDC2	-1.72839	3.6569	-5.95081	5.83e-08	1.51e-06	8.00597
FAP	2.87146	3.53078	5.94649	5.94e-08	1.54e-06	7.98802
LPO	-4.20028	-2.347	-5.94537	5.97e-08	1.54e-06	7.98336
GNA14	-2.18728	-0.381276	-5.945	5.98e-08	1.54e-06	7.98184
IL17RC	-1.11384	4.60064	-5.94135	6.07e-08	1.56e-06	7.96664
LONRF2	-3.44017	-1.68993	-5.94108	6.08e-08	1.56e-06	7.96555
ZSCAN18	-2.42316	1.69779	-5.92916	6.4e-08	1.64e-06	7.91605
SH2D5	3.52148	2.77618	5.92872	6.41e-08	1.64e-06	7.91424
OAS3	2.24431	7.58258	5.92491	6.52e-08	1.67e-06	7.89843
PTCH2	-2.2076	-0.890491	-5.92389	6.55e-08	1.67e-06	7.89417
LHX5	3.25625	-0.716554	5.92071	6.64e-08	1.69e-06	7.88098
ZNF43	-2.14306	0.911329	-5.92044	6.65e-08	1.69e-06	7.87985
FOXL2	3.08926	-0.0473575	5.91031	6.94e-08	1.76e-06	7.83788
KHDC1L	3.50525	-0.103489	5.90902	6.98e-08	1.77e-06	7.83251
NCMAP	-3.29006	-1.77923	-5.9039	7.14e-08	1.8e-06	7.81129
PRKN	-2.41892	-0.456419	-5.9036	7.14e-08	1.8e-06	7.81006
NEFL	3.70872	4.11919	5.90327	7.15e-08	1.8e-06	7.80871
CIDEA	-3.82272	-1.09211	-5.89729	7.34e-08	1.84e-06	7.78394
KAT2B	-1.843	4.06346	-5.89573	7.39e-08	1.85e-06	7.77746
ALKBH7	-1.20684	4.27545	-5.89571	7.39e-08	1.85e-06	7.77738
CA6	-3.71393	-2.45208	-5.89492	7.42e-08	1.85e-06	7.77409
KCNAB1	-1.62742	0.489743	-5.8941	7.44e-08	1.85e-06	7.77071
SLC26A6	1.03966	3.52225	5.89405	7.44e-08	1.85e-06	7.77052
ZNF662	-2.56364	0.16584	-5.88059	7.89e-08	1.95e-06	7.71482
NRIP3	2.10524	2.02303	5.88032	7.9e-08	1.95e-06	7.71369
NEIL3	1.90584	1.92487	5.87416	8.11e-08	2e-06	7.68822
CHTF18	1.28542	3.94623	5.87231	8.17e-08	2.01e-06	7.68057
PHLDB2	1.66652	6.03878	5.86869	8.3e-08	2.04e-06	7.66561
MTHFD1L	1.43408	5.18398	5.86464	8.44e-08	2.06e-06	7.64887
ALDH6A1	-1.41181	3.64599	-5.85861	8.67e-08	2.11e-06	7.62395
DNA2	1.16808	2.40873	5.85791	8.69e-08	2.11e-06	7.62107
ABL2	1.25389	5.45849	5.85739	8.71e-08	2.12e-06	7.61892
CKAP2	1.19473	5.72614	5.85479	8.81e-08	2.13e-06	7.60819
BLM	1.19057	3.27427	5.85476	8.81e-08	2.13e-06	7.60805
AMOT	-3.28602	1.82874	-5.8529	8.88e-08	2.15e-06	7.60036
ADAMTS14	2.01552	2.29679	5.85054	8.97e-08	2.16e-06	7.59064
SH3BGR	-2.3959	0.747369	-5.84907	9.03e-08	2.17e-06	7.58455
MMS22L	1.14026	3.88168	5.84336	9.25e-08	2.22e-06	7.561
FMO5	-1.8181	0.243867	-5.83842	9.45e-08	2.26e-06	7.54062
ADAMTS7	2.1538	2.72894	5.83599	9.55e-08	2.28e-06	7.53059
HSPB6	-3.80453	1.57871	-5.83565	9.56e-08	2.28e-06	7.5292
RMND5B	-1.16513	4.76873	-5.83446	9.61e-08	2.29e-06	7.5243
NFIA	-1.11441	5.15938	-5.83102	9.75e-08	2.32e-06	7.51012
MTURN	-1.4535	4.08498	-5.82884	9.84e-08	2.34e-06	7.50113
P4HA1	1.5779	5.59852	5.82786	9.88e-08	2.34e-06	7.49711
STK10	1.06801	5.19139	5.82194	1.01e-07	2.4e-06	7.47269
ME3	-1.99396	0.880575	-5.81895	1.03e-07	2.42e-06	7.4604
PLEKHB1	-2.79853	0.335677	-5.81838	1.03e-07	2.42e-06	7.45804
CCT6B	-1.47594	-0.0552952	-5.81657	1.04e-07	2.44e-06	7.45058
CTTNBP2	-3.30965	0.0720625	-5.81172	1.06e-07	2.48e-06	7.4306
INMT	-2.4005	0.339268	-5.80783	1.08e-07	2.52e-06	7.4146
HOMER3	1.47877	5.28561	5.80054	1.11e-07	2.59e-06	7.3846
MUC7	-7.07759	-1.25704	-5.79514	1.14e-07	2.64e-06	7.36239
ACAT1	-1.13677	4.621	-5.79164	1.15e-07	2.67e-06	7.34804
PLOD1	1.272	7.25451	5.79059	1.16e-07	2.68e-06	7.34371
HROB	1.31112	2.75565	5.78983	1.16e-07	2.69e-06	7.34059
FXYD5	1.62825	6.80729	5.78923	1.17e-07	2.69e-06	7.33812
SPRY4	1.58828	4.42072	5.78705	1.18e-07	2.71e-06	7.32915
KIAA1211L	-1.8344	2.5948	-5.7841	1.19e-07	2.74e-06	7.31703
MT-ND5	-1.59104	10.2503	-5.78085	1.21e-07	2.77e-06	7.30369
CBX7	-1.5965	3.4206	-5.77095	1.26e-07	2.88e-06	7.26304
SPC24	1.57781	3.13489	5.76458	1.29e-07	2.96e-06	7.23692
LDHD	-2.42902	2.14728	-5.76003	1.32e-07	3.01e-06	7.21823
HTN1	-4.05761	-3.28554	-5.75966	1.32e-07	3.01e-06	7.21673
PLEKHA6	-2.20714	2.43041	-5.75694	1.34e-07	3.04e-06	7.20557
WNT7A	3.08325	2.32314	5.75506	1.35e-07	3.06e-06	7.19787
ALDH1L1	-3.9149	1.00961	-5.74973	1.38e-07	3.12e-06	7.176
CHDH	-2.81607	0.160798	-5.74894	1.38e-07	3.12e-06	7.17276
ATP13A5	-3.60257	-1.49996	-5.74476	1.41e-07	3.17e-06	7.15565
RALGPS1	-1.4961	1.90686	-5.74398	1.41e-07	3.18e-06	7.15247
EPHX2	-2.15709	3.39646	-5.74271	1.42e-07	3.19e-06	7.14724
TSPAN12	-2.20424	0.879436	-5.74011	1.44e-07	3.22e-06	7.13663
TSGA10	-1.38178	0.540426	-5.73965	1.44e-07	3.22e-06	7.13473
ZNF281	1.02149	4.32978	5.73763	1.45e-07	3.24e-06	7.12645
VWA5A	-1.90027	3.83169	-5.73433	1.47e-07	3.27e-06	7.11297
MAD2L1	1.31541	4.53739	5.73342	1.48e-07	3.28e-06	7.10921
COL1A2	3.08609	10.3628	5.72858	1.51e-07	3.34e-06	7.08941
ACOT7	1.32457	6.12733	5.72483	1.53e-07	3.39e-06	7.0741
FEN1	1.15097	5.41994	5.72147	1.55e-07	3.43e-06	7.06035
DDAH2	-1.36319	4.44043	-5.71683	1.59e-07	3.49e-06	7.04136
PADI2	-3.08771	2.88177	-5.71558	1.59e-07	3.51e-06	7.03626
FAAP24	1.0094	2.03236	5.71385	1.61e-07	3.52e-06	7.02921
FITM2	-1.10154	3.16676	-5.71348	1.61e-07	3.52e-06	7.02766
SMC4	1.35819	5.96519	5.70726	1.65e-07	3.61e-06	7.00228
SSBP2	-1.57763	3.34762	-5.70573	1.66e-07	3.62e-06	6.99604
MSN	1.25065	9.57473	5.70535	1.66e-07	3.62e-06	6.99448
ACACB	-2.09712	2.28745	-5.70412	1.67e-07	3.64e-06	6.98944
CDC25B	1.49168	7.03684	5.69782	1.72e-07	3.72e-06	6.96371
EMCN	-1.9721	1.69886	-5.69711	1.72e-07	3.73e-06	6.96084
OSBPL3	1.05952	5.0932	5.69296	1.75e-07	3.79e-06	6.94389
PCLAF	1.64643	4.31568	5.688	1.79e-07	3.86e-06	6.92366
LRRC15	3.65507	4.30411	5.68639	1.8e-07	3.88e-06	6.9171
WIF1	-4.27624	-1.87318	-5.68634	1.8e-07	3.88e-06	6.91688
GAST	3.34912	-0.521543	5.68612	1.81e-07	3.88e-06	6.91599
NAAA	-1.26136	3.67501	-5.68392	1.82e-07	3.91e-06	6.90704
OIP5	1.33735	1.79481	5.68128	1.84e-07	3.95e-06	6.89626
SLC13A2	-3.43388	-2.43841	-5.67867	1.86e-07	3.98e-06	6.88563
PARP12	1.36986	5.82092	5.67794	1.87e-07	3.98e-06	6.88265
GPRASP1	-1.9796	0.462269	-5.67758	1.87e-07	3.98e-06	6.88117
CSRNP1	-1.2859	5.20782	-5.67528	1.89e-07	4.02e-06	6.8718
UBE2T	1.25366	3.47263	5.67066	1.93e-07	4.09e-06	6.85299
OAS2	2.18453	7.13489	5.66682	1.96e-07	4.15e-06	6.83734
GINS2	1.34299	3.85962	5.66276	1.99e-07	4.22e-06	6.82081
NIPA1	1.04208	4.60146	5.65649	2.05e-07	4.32e-06	6.7953
CA8	-2.75971	-2.04308	-5.65561	2.05e-07	4.33e-06	6.79171
PPM1L	-2.10895	3.56285	-5.64965	2.11e-07	4.44e-06	6.76748
SYNGR1	-2.49859	3.25257	-5.64315	2.17e-07	4.55e-06	6.74104
ACYP2	-1.10476	2.63087	-5.63926	2.2e-07	4.61e-06	6.72525
GABRP	-4.48468	1.07774	-5.63139	2.28e-07	4.76e-06	6.69326
HMGB3	1.05459	5.53143	5.63076	2.28e-07	4.76e-06	6.69071
ACSS2	-1.05503	5.39017	-5.62963	2.29e-07	4.78e-06	6.68612
PPDPFL	-2.94374	-3.31601	-5.62723	2.32e-07	4.8e-06	6.67638
PAIP2B	-2.0433	2.79572	-5.62709	2.32e-07	4.8e-06	6.67579
SHROOM3	-2.18562	3.86511	-5.62694	2.32e-07	4.8e-06	6.67518
MYLK3	-3.07457	-1.7584	-5.6258	2.33e-07	4.82e-06	6.67058
CYP11A1	-3.02357	-1.39892	-5.62041	2.38e-07	4.92e-06	6.64871
LRRN4CL	-2.49075	-0.115822	-5.61966	2.39e-07	4.93e-06	6.64564
FAM171A1	-2.09271	2.53461	-5.61818	2.41e-07	4.95e-06	6.63966
IL17RD	-1.73451	2.54551	-5.61529	2.44e-07	5e-06	6.62792
SYN2	-2.87754	-1.61917	-5.61414	2.45e-07	5.01e-06	6.62327
MCEE	-1.1081	2.55661	-5.61375	2.45e-07	5.01e-06	6.62169
SMIM10L2A	-2.48745	-0.125947	-5.61363	2.45e-07	5.01e-06	6.62119
TMC5	-3.00792	0.751211	-5.61254	2.46e-07	5.02e-06	6.61677
HELLS	1.29801	3.83355	5.60846	2.51e-07	5.08e-06	6.60025
CA3	-4.71847	-0.469187	-5.60629	2.53e-07	5.12e-06	6.59142
BARX2	-2.48618	4.68362	-5.60261	2.57e-07	5.18e-06	6.57651
FAM83A	2.95673	7.70314	5.60235	2.57e-07	5.18e-06	6.57547
MCM5	1.1197	6.38422	5.60034	2.59e-07	5.21e-06	6.56733
ZNF415	-2.37148	-0.199132	-5.59697	2.63e-07	5.28e-06	6.55369
CKMT2	-3.55958	-0.433578	-5.59397	2.66e-07	5.33e-06	6.54153
PRR27	-3.66492	-3.6154	-5.59127	2.7e-07	5.38e-06	6.5306
FNDC3B	1.27915	6.47383	5.58096	2.81e-07	5.59e-06	6.4889
PYGM	-4.14589	-0.158342	-5.5786	2.84e-07	5.63e-06	6.47934
SPRY2	-1.58045	3.57451	-5.57616	2.87e-07	5.68e-06	6.46949
SPINDOC	1.01371	4.11954	5.57598	2.87e-07	5.68e-06	6.46875
COBL	-3.48581	2.36177	-5.57581	2.88e-07	5.68e-06	6.46808
CCNG1	-1.12447	5.4227	-5.57553	2.88e-07	5.68e-06	6.46695
MET	1.33834	6.51456	5.57436	2.89e-07	5.7e-06	6.46222
BPIFA1	-4.47291	-2.47645	-5.574	2.9e-07	5.7e-06	6.46073
GALNS	1.08649	4.84189	5.57271	2.91e-07	5.72e-06	6.45554
ZNF135	-2.10225	-0.699617	-5.57178	2.92e-07	5.73e-06	6.45179
PPP1R12B	-1.79364	4.39592	-5.56958	2.95e-07	5.78e-06	6.4429
SLC34A2	-4.70956	-0.357853	-5.56809	2.97e-07	5.8e-06	6.43685
BTC	-2.55996	-0.324741	-5.56145	3.05e-07	5.95e-06	6.41004
PTPRH	2.67132	1.65087	5.56072	3.06e-07	5.96e-06	6.40708
CDK6	1.45754	6.65043	5.56011	3.07e-07	5.96e-06	6.40464
TNFRSF11A	-1.71472	1.94448	-5.5593	3.08e-07	5.98e-06	6.40135
ASAP1	1.02735	5.71507	5.55276	3.17e-07	6.13e-06	6.37498
ESCO2	1.54396	2.68938	5.55173	3.18e-07	6.14e-06	6.3708
ARHGEF39	1.48321	2.22309	5.54582	3.26e-07	6.27e-06	6.34696
MAP3K14	-1.14824	3.91568	-5.54519	3.27e-07	6.28e-06	6.34441
DCT	-3.05235	-2.89548	-5.54168	3.32e-07	6.36e-06	6.33029
C2orf88	-2.11963	0.0924787	-5.53951	3.35e-07	6.41e-06	6.32153
PLEK2	2.06106	5.7055	5.53701	3.38e-07	6.46e-06	6.31145
FBXO45	1.12514	5.7951	5.5367	3.39e-07	6.46e-06	6.31019
KBTBD3	-1.15188	0.89234	-5.5348	3.42e-07	6.51e-06	6.30255
BRCA2	1.41814	3.25443	5.53388	3.43e-07	6.52e-06	6.29885
FNDC4	-1.82088	1.93879	-5.5322	3.45e-07	6.56e-06	6.29208
GPR153	1.67795	5.52761	5.53044	3.48e-07	6.59e-06	6.28498
SLC44A3	-1.8494	2.35566	-5.5291	3.5e-07	6.6e-06	6.27958
DNMT1	1.05819	6.63335	5.52852	3.51e-07	6.61e-06	6.27726
VIT	-3.22646	0.00670252	-5.52191	3.6e-07	6.77e-06	6.25064
PMEPA1	1.93094	6.36511	5.51897	3.65e-07	6.83e-06	6.23883
ABHD14B	-1.09607	5.00262	-5.51895	3.65e-07	6.83e-06	6.23873
EYA2	-3.16412	2.54705	-5.51469	3.72e-07	6.95e-06	6.22158
SGO2	1.37113	3.3938	5.50766	3.83e-07	7.13e-06	6.1933
MUC5B	-6.06468	-0.0765325	-5.5034	3.89e-07	7.22e-06	6.17621
COL4A5	1.83088	5.65086	5.50322	3.9e-07	7.22e-06	6.17549
NCS1	1.06709	6.12838	5.50203	3.92e-07	7.25e-06	6.17069
ADAMTSL2	1.51857	1.93891	5.50122	3.93e-07	7.26e-06	6.16743
SCARA3	-1.79869	4.1694	-5.50006	3.95e-07	7.29e-06	6.16279
B4GALNT1	2.63078	2.26461	5.49784	3.99e-07	7.35e-06	6.15387
ADA	1.49794	4.42121	5.49735	3.99e-07	7.35e-06	6.15188
JADE1	-1.12787	3.71047	-5.49329	4.06e-07	7.47e-06	6.13557
APBA2	1.99087	2.13577	5.49127	4.1e-07	7.52e-06	6.12747
IGF2BP1	4.44626	0.121078	5.48759	4.16e-07	7.62e-06	6.11272
MAPKAPK3	-1.03484	5.75114	-5.48596	4.19e-07	7.66e-06	6.10617
FAM83H	1.50783	8.13847	5.4842	4.22e-07	7.71e-06	6.0991
ADAMTS6	1.89281	0.240216	5.48352	4.23e-07	7.72e-06	6.09637
ARHGAP20	-2.16151	0.295199	-5.4809	4.28e-07	7.8e-06	6.08586
EIF4E3	-1.49447	3.93027	-5.47677	4.35e-07	7.92e-06	6.06929
NNAT	-2.27561	-0.453886	-5.47106	4.46e-07	8.09e-06	6.04641
COL11A1	4.30423	4.05395	5.46664	4.54e-07	8.23e-06	6.02869
SAMD5	-2.72578	1.29514	-5.46637	4.55e-07	8.23e-06	6.02761
SCRN1	1.22156	6.54148	5.46491	4.57e-07	8.27e-06	6.02179
FN1	3.11069	9.43584	5.46217	4.63e-07	8.35e-06	6.01078
CYP4X1	-3.10584	1.34619	-5.46123	4.64e-07	8.38e-06	6.00703
OSR1	-2.72943	0.119563	-5.45876	4.69e-07	8.45e-06	5.99714
COX7A1	-2.39869	1.79689	-5.45402	4.79e-07	8.61e-06	5.97816
MEIS1	-1.5151	3.17996	-5.44938	4.88e-07	8.73e-06	5.95962
TM7SF2	-2.46596	3.83211	-5.44934	4.88e-07	8.73e-06	5.95945
SIAE	-1.29039	4.24481	-5.44765	4.91e-07	8.78e-06	5.95268
EN1	3.3341	1.73633	5.44725	4.92e-07	8.78e-06	5.95107
SLAIN1	-2.15957	-0.192703	-5.44716	4.92e-07	8.78e-06	5.95072
FRZB	-2.60442	0.989896	-5.44326	5e-07	8.89e-06	5.93512
PRH1	-2.43073	-2.67846	-5.44106	5.05e-07	8.96e-06	5.92632
F10	-2.24752	-0.632379	-5.43824	5.11e-07	9.04e-06	5.91506
ZNF471	-2.39323	-0.475266	-5.43494	5.18e-07	9.15e-06	5.90186
BRIP1	1.49491	3.04742	5.42897	5.31e-07	9.36e-06	5.87802
IBSP	2.93251	-0.77223	5.42588	5.38e-07	9.47e-06	5.8657
SGO1	1.48887	2.06772	5.42579	5.38e-07	9.47e-06	5.86533
ATAD5	1.11922	2.8393	5.42304	5.44e-07	9.55e-06	5.85436
PTTG1	1.57654	5.27228	5.422	5.47e-07	9.58e-06	5.85019
SLC7A8	1.75461	7.3419	5.42156	5.48e-07	9.59e-06	5.84845
CAPS	-1.88146	1.58343	-5.41978	5.52e-07	9.63e-06	5.84135
DUSP28	-1.0129	0.975817	-5.41801	5.56e-07	9.69e-06	5.8343
ZNF425	-1.41021	0.707417	-5.41299	5.68e-07	9.86e-06	5.81427
PIMREG	1.65946	2.4917	5.41192	5.7e-07	9.89e-06	5.81
PIK3CD	1.2023	4.88382	5.41104	5.72e-07	9.92e-06	5.80649
NRP2	1.47346	6.24637	5.40512	5.86e-07	1.01e-05	5.78289
RFC4	1.20277	4.1824	5.40347	5.9e-07	1.02e-05	5.77634
PIFO	-2.17903	-1.04814	-5.39518	6.11e-07	1.05e-05	5.74332
ITGA11	2.92769	3.25148	5.39415	6.14e-07	1.06e-05	5.7392
OSCP1	-1.18244	1.59759	-5.39262	6.18e-07	1.06e-05	5.7331
LRRC8C	1.42706	4.79253	5.39226	6.18e-07	1.06e-05	5.73166
CISH	-1.32605	3.60463	-5.38944	6.26e-07	1.07e-05	5.72046
COL6A3	2.76354	8.53612	5.38511	6.37e-07	1.09e-05	5.70322
IFI6	2.70774	7.50076	5.38451	6.39e-07	1.09e-05	5.70085
SCGB3A1	-4.60714	-1.70765	-5.38421	6.39e-07	1.09e-05	5.69966
MYH11	-3.16003	3.69366	-5.38309	6.42e-07	1.09e-05	5.69519
PTGDS	-2.28545	3.01614	-5.3807	6.49e-07	1.1e-05	5.68569
ENPP4	-2.53431	1.04361	-5.37983	6.51e-07	1.1e-05	5.68225
SLC3A2	1.04627	8.43959	5.37967	6.52e-07	1.1e-05	5.68161
PRKAA2	-3.66383	0.000216893	-5.3787	6.54e-07	1.11e-05	5.67773
RECQL4	1.45096	4.3551	5.37708	6.59e-07	1.11e-05	5.67129
KRT35	-2.53652	-3.69465	-5.37672	6.6e-07	1.11e-05	5.66988
AK9	-1.1689	1.28299	-5.3759	6.62e-07	1.11e-05	5.66662
SLCO4C1	-2.67124	-1.87418	-5.37464	6.65e-07	1.12e-05	5.66161
COQ8A	-1.76109	4.33406	-5.37439	6.66e-07	1.12e-05	5.6606
DLX1	2.42068	1.0202	5.36493	6.92e-07	1.16e-05	5.62304
SLC15A3	1.79947	5.05858	5.35996	7.07e-07	1.18e-05	5.60329
IL34	-2.40318	1.8354	-5.35958	7.08e-07	1.18e-05	5.60181
UCN2	1.96365	1.23147	5.35872	7.1e-07	1.18e-05	5.59839
BEND7	-2.30412	0.348921	-5.35814	7.12e-07	1.19e-05	5.59606
FAM221A	-1.98981	-0.0409861	-5.35016	7.36e-07	1.22e-05	5.56441
TP63	1.44198	8.87586	5.34862	7.41e-07	1.23e-05	5.55833
ATP6V0E2	-1.9412	2.20248	-5.34684	7.46e-07	1.24e-05	5.55126
TJP3	-3.04597	1.56621	-5.34635	7.48e-07	1.24e-05	5.54932
CCL11	2.90814	0.0159825	5.34542	7.51e-07	1.24e-05	5.54564
MPZ	-2.08831	-0.336541	-5.3448	7.52e-07	1.24e-05	5.54317
CACNA2D2	-1.71632	-0.418444	-5.34363	7.56e-07	1.25e-05	5.53854
CDH3	1.87719	8.87221	5.34304	7.58e-07	1.25e-05	5.53621
PLOD3	1.43197	5.78379	5.34252	7.6e-07	1.25e-05	5.53413
SHMT1	-1.18718	5.01892	-5.34071	7.65e-07	1.26e-05	5.52696
ACP6	-1.52516	1.99909	-5.3403	7.67e-07	1.26e-05	5.52536
CSF2	3.10846	-0.320723	5.33762	7.75e-07	1.27e-05	5.51474
DTX3L	1.16703	6.85129	5.33193	7.93e-07	1.3e-05	5.49221
PROM1	-4.29688	-1.1265	-5.33139	7.95e-07	1.3e-05	5.49006
GINS4	1.30508	2.83976	5.3275	8.08e-07	1.32e-05	5.47465
NTF3	-2.5641	-1.00046	-5.31994	8.34e-07	1.35e-05	5.44477
SEMA3G	-1.78635	1.99055	-5.31596	8.47e-07	1.37e-05	5.42903
LAMC1	1.20718	7.7181	5.31532	8.5e-07	1.38e-05	5.42649
WDR54	1.51959	3.72104	5.31492	8.51e-07	1.38e-05	5.42492
CKS1B	1.11785	4.766	5.31185	8.62e-07	1.39e-05	5.41278
SCIN	-2.30776	1.62324	-5.31038	8.67e-07	1.4e-05	5.40698
FXYD1	-2.36269	-1.31156	-5.31001	8.68e-07	1.4e-05	5.40551
RTN4R	1.40471	2.75147	5.30795	8.76e-07	1.4e-05	5.39737
ZNF469	2.45186	3.5003	5.30318	8.93e-07	1.43e-05	5.37854
ZNF554	-1.16153	1.22545	-5.30153	8.99e-07	1.44e-05	5.37201
CNTFR	-3.13448	-0.378583	-5.29866	9.1e-07	1.45e-05	5.36068
FCER1A	-2.77298	0.751906	-5.29853	9.1e-07	1.45e-05	5.36017
SBSPON	-2.5188	0.249789	-5.29839	9.11e-07	1.45e-05	5.35963
FBN2	3.35911	3.6319	5.29012	9.42e-07	1.5e-05	5.32701
KRT32	-2.64483	-1.88502	-5.28648	9.57e-07	1.52e-05	5.31263
BPIFB2	-5.99809	-1.80995	-5.28283	9.71e-07	1.54e-05	5.29825
DBF4B	1.05226	2.60222	5.28205	9.74e-07	1.54e-05	5.29519
TREM2	1.97635	3.24555	5.28015	9.82e-07	1.55e-05	5.28769
OGFRL1	-1.2182	5.43601	-5.27475	1e-06	1.58e-05	5.26642
LY6K	2.18197	3.9144	5.27292	1.01e-06	1.59e-05	5.25922
APOBEC3B	1.88553	3.65729	5.27287	1.01e-06	1.59e-05	5.25903
H2AC11	1.71725	0.659655	5.27069	1.02e-06	1.6e-05	5.25047
STX1A	1.42604	2.03778	5.26832	1.03e-06	1.62e-05	5.24111
HNMT	-1.7064	2.48728	-5.26714	1.04e-06	1.62e-05	5.23649
MAOB	-3.02661	2.23366	-5.26706	1.04e-06	1.62e-05	5.23617
SLC16A7	-2.43313	3.23909	-5.26584	1.04e-06	1.63e-05	5.23137
SLC24A2	2.62883	-0.321072	5.25706	1.08e-06	1.68e-05	5.19684
VSIG1	1.74788	0.196518	5.25541	1.09e-06	1.69e-05	5.19036
CHST2	2.18184	5.29463	5.25445	1.09e-06	1.7e-05	5.18659
IL11RA	-1.49091	1.88317	-5.25425	1.09e-06	1.7e-05	5.18578
DNAH1	-1.47028	1.19352	-5.25209	1.1e-06	1.71e-05	5.17731
CBX2	1.68631	4.00207	5.25105	1.11e-06	1.71e-05	5.1732
GDF10	-2.74604	-1.52107	-5.24931	1.11e-06	1.72e-05	5.16636
CBLB	1.12559	4.78782	5.24803	1.12e-06	1.73e-05	5.16135
CA13	-1.90486	1.79145	-5.24667	1.13e-06	1.74e-05	5.15601
MTARC2	-1.89131	1.25342	-5.24637	1.13e-06	1.74e-05	5.15483
TEDC1	1.21992	3.71107	5.24535	1.13e-06	1.74e-05	5.15082
MLPH	-2.57277	1.35427	-5.24482	1.13e-06	1.74e-05	5.14876
PIF1	1.46479	1.48124	5.24125	1.15e-06	1.77e-05	5.13472
OASL	2.79025	4.68493	5.23854	1.16e-06	1.78e-05	5.1241
IGSF10	-3.19824	0.30654	-5.23233	1.19e-06	1.83e-05	5.09972
ROM1	-1.08421	0.983764	-5.23199	1.2e-06	1.83e-05	5.0984
HTR7	2.49742	2.56386	5.22793	1.22e-06	1.86e-05	5.08247
CX3CR1	-2.31093	0.257657	-5.22409	1.24e-06	1.88e-05	5.06743
STAT1	1.61632	8.70639	5.22263	1.24e-06	1.89e-05	5.06171
CALCOCO1	-1.00802	5.52419	-5.22145	1.25e-06	1.9e-05	5.05709
MICB	1.72203	2.63055	5.22138	1.25e-06	1.9e-05	5.05682
STARD4	1.25968	4.10911	5.21994	1.26e-06	1.91e-05	5.05117
NPPC	-2.87211	-2.37223	-5.20832	1.32e-06	1.98e-05	5.00566
RAD54B	1.0243	1.19396	5.20794	1.32e-06	1.98e-05	5.00421
REPIN1	-1.19934	5.02411	-5.20152	1.35e-06	2.03e-05	4.97909
ITGA3	1.70472	8.7672	5.1982	1.37e-06	2.05e-05	4.96609
SLC26A2	-1.41876	4.41762	-5.19222	1.41e-06	2.1e-05	4.94272
ZNF862	-1.3597	1.8189	-5.19178	1.41e-06	2.1e-05	4.94101
S100A1	-3.25063	1.28339	-5.18906	1.42e-06	2.11e-05	4.9304
DDAH1	-1.79091	2.70813	-5.18333	1.46e-06	2.16e-05	4.908
ADGRE2	1.60275	2.92358	5.17659	1.5e-06	2.21e-05	4.88172
OLFML2A	1.46882	5.71033	5.1762	1.5e-06	2.21e-05	4.8802
CHN1	1.59002	3.01387	5.17576	1.5e-06	2.21e-05	4.87849
B3GALT5	-3.61407	-0.625286	-5.16614	1.56e-06	2.29e-05	4.84098
PXN	1.24268	7.28443	5.16401	1.58e-06	2.31e-05	4.83266
BDH2	-1.06095	3.09685	-5.16172	1.59e-06	2.33e-05	4.82374
ABCC1	1.29641	7.18555	5.16026	1.6e-06	2.34e-05	4.81807
CELSR1	1.18281	7.38707	5.16007	1.6e-06	2.34e-05	4.81734
KIF9	-1.06514	1.48464	-5.15816	1.62e-06	2.35e-05	4.80988
NID1	2.16248	5.88315	5.15635	1.63e-06	2.36e-05	4.80284
CENPM	1.20157	3.0559	5.15556	1.63e-06	2.37e-05	4.79975
ASAP3	-1.48543	4.45622	-5.15531	1.63e-06	2.37e-05	4.79878
ARPC1B	1.11653	7.37873	5.14949	1.67e-06	2.42e-05	4.77615
IQCN	-2.04306	-0.484302	-5.1463	1.7e-06	2.45e-05	4.76373
C6orf58	-4.37399	-1.97796	-5.14589	1.7e-06	2.45e-05	4.76214
KIRREL1	1.2699	6.05742	5.14275	1.72e-06	2.47e-05	4.74992
RNASEH2A	1.10708	4.8876	5.14116	1.73e-06	2.49e-05	4.74377
FSTL3	1.7521	4.80042	5.14109	1.73e-06	2.49e-05	4.74347
DCD	-2.77757	-3.89925	-5.14069	1.73e-06	2.49e-05	4.74194
IL1A	3.23767	4.17408	5.14051	1.74e-06	2.49e-05	4.74123
TOR4A	2.08377	4.61454	5.1382	1.75e-06	2.5e-05	4.73225
ATOH8	-1.82412	0.286026	-5.13255	1.79e-06	2.56e-05	4.71029
KIT	-2.37852	2.11689	-5.13093	1.8e-06	2.57e-05	4.70401
ACAN	2.39394	1.07896	5.13013	1.81e-06	2.57e-05	4.70091
FAM172A	-1.01803	3.75071	-5.12884	1.82e-06	2.58e-05	4.6959
N4BP3	-1.25767	3.43522	-5.12804	1.83e-06	2.59e-05	4.69277
HOXB9	3.00175	-1.34328	5.12429	1.85e-06	2.62e-05	4.67824
NPDC1	-1.52851	3.69107	-5.1242	1.85e-06	2.62e-05	4.67789
SERPINA5	-2.65626	-1.67217	-5.12288	1.86e-06	2.64e-05	4.67276
TDO2	2.57658	1.28396	5.12201	1.87e-06	2.64e-05	4.66939
NOX4	1.96739	1.51879	5.1218	1.87e-06	2.64e-05	4.66856
VWA2	-2.37412	0.664758	-5.11982	1.89e-06	2.66e-05	4.66091
ZNF568	-1.89352	0.50105	-5.11869	1.9e-06	2.67e-05	4.65652
SLC2A6	1.6646	2.29129	5.11839	1.9e-06	2.67e-05	4.65534
SMC2	1.10974	5.54935	5.11817	1.9e-06	2.67e-05	4.65449
COL2A1	2.73642	-0.624656	5.11664	1.91e-06	2.68e-05	4.64857
DDX60L	1.6524	4.69552	5.10971	1.97e-06	2.75e-05	4.62168
H3C10	1.98726	1.36129	5.10871	1.97e-06	2.76e-05	4.61783
ALDH1A1	-3.40927	3.51677	-5.10866	1.97e-06	2.76e-05	4.61763
MMP10	3.4343	4.66439	5.10292	2.02e-06	2.81e-05	4.59542
ACSL1	-1.55275	6.52845	-5.09813	2.06e-06	2.86e-05	4.57684
CYP27B1	2.21497	2.82097	5.09209	2.11e-06	2.92e-05	4.55349
STAC2	-3.23532	-1.36755	-5.09194	2.11e-06	2.92e-05	4.55291
LONRF1	-1.22718	3.33113	-5.0916	2.12e-06	2.92e-05	4.55159
ZFP92	1.88488	0.482165	5.0907	2.12e-06	2.93e-05	4.54812
GRAMD2B	-1.1407	3.72583	-5.08722	2.15e-06	2.96e-05	4.53464
PSRC1	1.25387	2.81671	5.08619	2.16e-06	2.97e-05	4.53068
CYP27A1	-2.22843	2.86458	-5.08413	2.18e-06	2.99e-05	4.52272
PCDHGC5	3.30093	1.12538	5.0819	2.2e-06	3.01e-05	4.5141
CFAP69	-1.15177	0.042912	-5.08164	2.2e-06	3.01e-05	4.51309
STK17A	1.12454	6.04737	5.07843	2.23e-06	3.04e-05	4.5007
SLC20A1	1.12127	5.73619	5.07781	2.24e-06	3.04e-05	4.49831
SOX12	1.17293	4.32938	5.07518	2.26e-06	3.07e-05	4.48814
GPR158	3.27193	0.768979	5.07371	2.27e-06	3.09e-05	4.48248
CCM2	1.03059	6.02422	5.07129	2.3e-06	3.11e-05	4.47313
SLC9A4	-2.88599	-1.83547	-5.0702	2.31e-06	3.12e-05	4.46891
THSD1	1.61793	4.26645	5.06922	2.31e-06	3.13e-05	4.46512
NCOA7	-1.1905	6.093	-5.06786	2.33e-06	3.14e-05	4.4599
CHI3L2	-3.29774	2.33672	-5.06587	2.35e-06	3.17e-05	4.45223
FYCO1	-1.16479	5.53852	-5.06556	2.35e-06	3.17e-05	4.45103
ASB11	-2.61003	-3.18207	-5.06369	2.37e-06	3.18e-05	4.44379
PRKDC	1.00923	8.23621	5.06367	2.37e-06	3.18e-05	4.44371
MGLL	-1.66048	6.15419	-5.05821	2.42e-06	3.24e-05	4.42267
MANSC1	-2.05414	4.11951	-5.0579	2.42e-06	3.24e-05	4.42149
ZNF829	-1.89747	-0.254147	-5.05762	2.43e-06	3.24e-05	4.42039
SH3BP1	1.14466	6.15726	5.05599	2.44e-06	3.26e-05	4.41413
GKAP1	-1.71522	-0.204668	-5.05519	2.45e-06	3.26e-05	4.41105
ACAA1	-1.02901	5.09662	-5.05428	2.46e-06	3.27e-05	4.40753
CSN3	-2.9052	-3.58684	-5.05355	2.47e-06	3.28e-05	4.40471
CCL28	-2.68582	2.39974	-5.05092	2.49e-06	3.31e-05	4.39457
MYO7A	1.45541	2.71457	5.04764	2.52e-06	3.34e-05	4.38195
TMEM150C	-1.81403	1.82133	-5.04762	2.53e-06	3.34e-05	4.3819
ATP6V1C2	-2.46753	2.06024	-5.04449	2.56e-06	3.38e-05	4.36984
FMC1	-1.09356	1.72664	-5.04296	2.57e-06	3.39e-05	4.36394
BPIFB1	-5.30247	-0.855849	-5.0428	2.57e-06	3.39e-05	4.36332
PLLP	-1.73119	2.7105	-5.04016	2.6e-06	3.43e-05	4.35317
MAN1C1	-1.75391	1.99922	-5.03874	2.62e-06	3.44e-05	4.34772
TSPOAP1	-2.06892	0.908133	-5.03717	2.63e-06	3.45e-05	4.34168
ZNF439	-1.43131	0.0333416	-5.03648	2.64e-06	3.46e-05	4.33903
AGT	-2.74259	0.439426	-5.03393	2.67e-06	3.49e-05	4.32922
LMOD1	-2.27962	1.96131	-5.03328	2.67e-06	3.5e-05	4.32673
RNASE10	3.36751	-0.664512	5.03245	2.68e-06	3.5e-05	4.32354
SEC11C	-1.12496	4.38064	-5.03231	2.69e-06	3.5e-05	4.32299
APBB1	-1.57628	2.63787	-5.03195	2.69e-06	3.51e-05	4.32159
PARM1	-1.99973	3.19823	-5.03053	2.7e-06	3.52e-05	4.31613
GJB3	1.97535	6.74181	5.02907	2.72e-06	3.53e-05	4.31055
FNDC1	3.27626	3.89929	5.02864	2.73e-06	3.54e-05	4.30887
RCN3	2.08996	4.37612	5.02624	2.75e-06	3.57e-05	4.29966
MCF2L	-1.91893	3.02419	-5.02532	2.76e-06	3.58e-05	4.29614
LRP12	1.21745	4.5579	5.02465	2.77e-06	3.58e-05	4.29356
ENTPD7	1.37726	4.50541	5.02256	2.79e-06	3.61e-05	4.28554
EIF4EBP3	-1.92113	0.652831	-5.01882	2.83e-06	3.66e-05	4.27119
DOP1B	-1.05319	4.83688	-5.01795	2.84e-06	3.67e-05	4.26783
TNFRSF9	1.81768	1.96077	5.01608	2.87e-06	3.69e-05	4.26066
CDO1	-2.75666	-1.27565	-5.01504	2.88e-06	3.7e-05	4.25667
LHX1	3.368	-0.307477	5.00991	2.94e-06	3.76e-05	4.23697
RBPMS	-1.35615	3.77924	-5.00984	2.94e-06	3.76e-05	4.23671
ADCY7	1.29966	4.34585	5.0095	2.94e-06	3.76e-05	4.2354
MKRN2OS	-1.88635	-0.234411	-5.00949	2.94e-06	3.76e-05	4.23539
BAIAP2L2	2.30106	3.1101	5.00805	2.96e-06	3.78e-05	4.22986
MISP3	-1.7298	0.706991	-5.00006	3.06e-06	3.89e-05	4.19926
ABCA5	-1.10612	3.37357	-4.99829	3.08e-06	3.92e-05	4.19245
COL6A1	2.08445	8.6378	4.99522	3.12e-06	3.96e-05	4.1807
CCDC125	-1.1975	2.69411	-4.9898	3.18e-06	4.04e-05	4.15996
MYO5C	-2.32222	2.53223	-4.9884	3.2e-06	4.06e-05	4.15459
ARID3A	1.0207	3.3762	4.9841	3.26e-06	4.12e-05	4.13814
ZNF737	-2.10994	-0.506346	-4.98329	3.27e-06	4.13e-05	4.13506
CRYL1	-1.27283	3.61533	-4.98287	3.27e-06	4.14e-05	4.13347
CERCAM	1.78783	5.55459	4.97779	3.34e-06	4.22e-05	4.11403
PTPRN2	-1.68971	1.18567	-4.97614	3.36e-06	4.24e-05	4.10771
RBM20	-2.15286	-0.76722	-4.97596	3.36e-06	4.24e-05	4.10703
MYL5	-1.2415	2.13344	-4.97306	3.4e-06	4.28e-05	4.09594
ANO8	-1.03481	3.14104	-4.97091	3.43e-06	4.31e-05	4.08775
EPHB2	2.20949	4.16821	4.96995	3.45e-06	4.32e-05	4.0841
MAP4K2	1.00196	4.27802	4.96737	3.48e-06	4.36e-05	4.07424
CYP2J2	-2.0109	1.9589	-4.96595	3.5e-06	4.39e-05	4.06883
MGP	-2.79452	4.36397	-4.96484	3.52e-06	4.4e-05	4.06457
SLC25A4	-2.10507	3.70436	-4.9622	3.55e-06	4.44e-05	4.05451
PHKG1	-2.23389	-0.49974	-4.96033	3.58e-06	4.47e-05	4.04738
TLCD4	-2.57447	0.645333	-4.95971	3.59e-06	4.48e-05	4.04499
TOX2	1.77567	2.43718	4.95916	3.6e-06	4.48e-05	4.04289
XRCC3	1.03563	3.67006	4.95816	3.61e-06	4.5e-05	4.0391
CDK5R1	1.62877	4.22584	4.95771	3.62e-06	4.5e-05	4.03737
CAVIN2	-1.8845	2.48022	-4.95733	3.62e-06	4.5e-05	4.03593
MARCHF3	-1.50369	1.57368	-4.95614	3.64e-06	4.52e-05	4.03138
S100B	-1.99753	2.25487	-4.95387	3.67e-06	4.55e-05	4.02274
PTN	-2.78252	2.51641	-4.9532	3.68e-06	4.56e-05	4.02018
MT-ND1	-1.38699	10.4281	-4.9514	3.71e-06	4.59e-05	4.01334
PLAAT3	-2.06544	2.30431	-4.94983	3.73e-06	4.62e-05	4.00734
DUSP9	2.74523	1.69356	4.94552	3.8e-06	4.68e-05	3.99092
CD109	1.24565	6.75475	4.94241	3.85e-06	4.72e-05	3.97908
GPR39	2.11225	1.5105	4.94164	3.86e-06	4.73e-05	3.97617
PAEP	2.91588	-0.83951	4.94153	3.86e-06	4.73e-05	3.97575
FRY	-1.92862	2.32992	-4.94002	3.88e-06	4.75e-05	3.97001
CKS2	1.35378	4.70122	4.93703	3.93e-06	4.8e-05	3.9586
KIF20B	1.0515	4.39221	4.93667	3.94e-06	4.8e-05	3.95725
APOL1	2.20118	7.90518	4.93543	3.95e-06	4.82e-05	3.95254
KREMEN2	2.15599	2.40016	4.93417	3.97e-06	4.84e-05	3.94774
ABI3BP	-2.73783	2.38622	-4.93294	3.99e-06	4.86e-05	3.94306
SOCS1	1.30652	2.7994	4.93212	4.01e-06	4.87e-05	3.93994
NCAPG2	1.03832	4.79543	4.93122	4.02e-06	4.88e-05	3.93653
FUT6	-3.99589	0.896545	-4.92878	4.06e-06	4.92e-05	3.92725
PRELID3A	1.1596	0.730778	4.92449	4.13e-06	5e-05	3.91096
TMEM217	-1.37968	0.145991	-4.92073	4.19e-06	5.06e-05	3.89665
P4HTM	-1.38582	2.66642	-4.91936	4.22e-06	5.08e-05	3.89144
CAPN13	-3.50854	-1.66605	-4.91683	4.26e-06	5.12e-05	3.88186
RHEBL1	1.34606	0.221186	4.9142	4.3e-06	5.16e-05	3.87188
KCNQ4	-2.01407	-0.461055	-4.91327	4.32e-06	5.18e-05	3.86833
NID2	2.3614	3.39736	4.91222	4.34e-06	5.19e-05	3.86436
DHRS7C	-2.50816	-3.55741	-4.91222	4.34e-06	5.19e-05	3.86434
EGFL6	2.09947	2.93101	4.9122	4.34e-06	5.19e-05	3.86429
IL7R	1.85056	4.76838	4.9121	4.34e-06	5.19e-05	3.86391
TNFRSF4	1.64112	1.34204	4.91108	4.36e-06	5.2e-05	3.86005
PLCB4	-2.56777	0.23169	-4.90794	4.41e-06	5.26e-05	3.84813
PIK3R1	-1.39601	5.31024	-4.90757	4.42e-06	5.26e-05	3.84671
FAT2	1.68793	7.99165	4.90646	4.44e-06	5.28e-05	3.84251
POGLUT2	1.23387	2.53584	4.90578	4.45e-06	5.28e-05	3.83994
IGSF3	1.08339	7.45745	4.9027	4.5e-06	5.34e-05	3.82826
MCM7	1.08694	7.17365	4.89944	4.56e-06	5.41e-05	3.81589
LGR6	-2.54797	0.992808	-4.89711	4.6e-06	5.45e-05	3.80707
TBX2	1.60674	2.38321	4.8965	4.62e-06	5.45e-05	3.80476
TNXB	-2.52948	2.11055	-4.89278	4.68e-06	5.53e-05	3.79066
AZGP1	-4.50979	1.64134	-4.89078	4.72e-06	5.57e-05	3.7831
IGF1R	1.04018	6.90935	4.88345	4.86e-06	5.73e-05	3.75537
POSTN	2.9925	6.98391	4.88039	4.92e-06	5.78e-05	3.7438
RBP4	-3.09268	-1.54609	-4.87442	5.04e-06	5.91e-05	3.72123
HAAO	-1.65909	0.899053	-4.874	5.05e-06	5.91e-05	3.71965
CCDC9B	-1.70154	3.23165	-4.87241	5.08e-06	5.94e-05	3.71365
CLCNKB	-2.82376	-2.57028	-4.87199	5.09e-06	5.95e-05	3.71205
DRC3	-1.05432	0.59703	-4.86907	5.14e-06	6.01e-05	3.70102
KIAA1324	-2.93307	1.92515	-4.86856	5.15e-06	6.02e-05	3.69911
FAM174B	-1.50362	2.21388	-4.86829	5.16e-06	6.02e-05	3.6981
B3GNT4	1.68366	1.27361	4.86598	5.21e-06	6.07e-05	3.68939
PYGL	1.27878	7.60939	4.86033	5.33e-06	6.19e-05	3.66806
NEIL1	-1.53772	0.797775	-4.86029	5.33e-06	6.19e-05	3.6679
PLPP4	2.92746	0.355401	4.85933	5.35e-06	6.21e-05	3.66429
ZBED3	-1.40894	1.84559	-4.85929	5.35e-06	6.21e-05	3.66414
HIBCH	-1.01621	4.65531	-4.85903	5.35e-06	6.21e-05	3.66317
MND1	1.19041	1.62009	4.85862	5.36e-06	6.21e-05	3.6616
TRPA1	2.25988	-0.832257	4.85761	5.38e-06	6.21e-05	3.65781
MCTP1	1.38141	3.84194	4.85742	5.39e-06	6.21e-05	3.65707
IFI44	2.0093	5.03827	4.85171	5.51e-06	6.35e-05	3.63557
AHNAK2	1.63892	8.76822	4.8508	5.53e-06	6.36e-05	3.63215
RBP7	-2.29878	0.659952	-4.84797	5.59e-06	6.43e-05	3.62147
KCNIP2	-2.02297	-1.2522	-4.84759	5.6e-06	6.43e-05	3.62005
TMEM231	-1.53528	1.04698	-4.8474	5.6e-06	6.43e-05	3.61933
SLITRK5	-3.13937	-1.61463	-4.84587	5.64e-06	6.47e-05	3.61355
ROR1	-1.85301	1.30755	-4.83776	5.82e-06	6.66e-05	3.58303
LMNB1	1.00035	5.56755	4.83755	5.83e-06	6.66e-05	3.58223
GFRA1	-2.84763	1.19381	-4.83586	5.86e-06	6.7e-05	3.57589
ARSG	-1.11838	1.93462	-4.83083	5.98e-06	6.82e-05	3.55697
ATP1B3	1.17037	8.54196	4.825	6.12e-06	6.96e-05	3.53508
CABLES1	-1.42795	2.70215	-4.82183	6.2e-06	7.04e-05	3.52317
ZNF493	-1.83936	0.506065	-4.82174	6.2e-06	7.04e-05	3.52284
NRG1	2.50944	4.9247	4.81949	6.25e-06	7.1e-05	3.51438
MYO15B	-1.55678	1.91085	-4.81859	6.28e-06	7.12e-05	3.51101
APLN	2.12681	2.72117	4.81748	6.3e-06	7.14e-05	3.50683
GPR68	1.66258	4.84354	4.8165	6.33e-06	7.17e-05	3.50316
BBOF1	-1.04732	1.44656	-4.81474	6.37e-06	7.2e-05	3.49654
NDRG1	1.73645	10.6965	4.81375	6.4e-06	7.23e-05	3.49284
TNFRSF19	-1.92447	3.20304	-4.81149	6.45e-06	7.28e-05	3.48436
FAIM2	-1.97298	-0.543812	-4.81135	6.46e-06	7.28e-05	3.48385
PRKAR2B	-1.78675	1.59057	-4.80922	6.51e-06	7.32e-05	3.47585
TMEM63A	-1.03085	4.5356	-4.80843	6.53e-06	7.33e-05	3.47288
DNAH17	3.06605	4.14036	4.80673	6.58e-06	7.38e-05	3.4665
SLCO1B3	3.66661	-0.130296	4.80391	6.65e-06	7.45e-05	3.45595
AMPD1	-3.17945	-1.65763	-4.80077	6.73e-06	7.52e-05	3.44417
TAP2	1.20024	6.05625	4.8004	6.74e-06	7.53e-05	3.4428
MAML3	-1.44635	2.97953	-4.79957	6.76e-06	7.54e-05	3.43968
SCNN1B	-3.24558	3.00932	-4.79781	6.81e-06	7.58e-05	3.4331
ZNF385D	-2.04736	-0.123881	-4.79716	6.83e-06	7.59e-05	3.43067
MPV17L	-2.61852	0.0523318	-4.79649	6.85e-06	7.6e-05	3.42814
ADHFE1	-2.05516	0.0895355	-4.79375	6.92e-06	7.67e-05	3.41789
TMEM178B	-2.67878	0.152228	-4.79097	7e-06	7.75e-05	3.4075
BTG2	-1.21606	6.52275	-4.79061	7.01e-06	7.75e-05	3.40613
HTN3	-3.32551	-3.52536	-4.79017	7.02e-06	7.76e-05	3.40451
AMIGO1	-1.86378	1.36799	-4.78913	7.05e-06	7.79e-05	3.40061
MARVELD1	1.06417	5.93476	4.78538	7.15e-06	7.89e-05	3.38659
SLC19A3	-2.07177	-0.63827	-4.78077	7.28e-06	8.01e-05	3.36936
FOXS1	1.64599	-0.120684	4.77709	7.39e-06	8.12e-05	3.35559
HOXD8	1.3271	1.63378	4.77617	7.41e-06	8.15e-05	3.35215
CAPN5	-1.53059	3.29912	-4.77472	7.46e-06	8.19e-05	3.34673
KATNAL2	-1.70588	-0.450588	-4.77192	7.54e-06	8.27e-05	3.3363
ATP1A2	-4.08412	-0.0672545	-4.77108	7.56e-06	8.29e-05	3.33317
SMPDL3A	-1.34535	3.31552	-4.76906	7.62e-06	8.34e-05	3.32562
CLCA2	2.39812	9.11223	4.76622	7.71e-06	8.42e-05	3.31502
PLPP3	-1.58721	4.73397	-4.7661	7.71e-06	8.42e-05	3.31457
STXBP6	-2.3933	-0.28175	-4.76249	7.82e-06	8.53e-05	3.30112
PERM1	-1.5173	2.27619	-4.75279	8.12e-06	8.85e-05	3.26498
SPARC	1.91695	9.66094	4.75161	8.16e-06	8.87e-05	3.26055
AMY2B	-1.97193	-0.917298	-4.75081	8.18e-06	8.89e-05	3.25758
SPEF2	-1.65391	-0.372581	-4.74686	8.31e-06	8.99e-05	3.24286
BCAS1	-2.63601	1.3392	-4.74612	8.34e-06	9.01e-05	3.24011
NELL2	3.25159	5.28804	4.74361	8.42e-06	9.09e-05	3.23078
TLR5	-1.52784	2.60339	-4.74103	8.5e-06	9.16e-05	3.22119
ZAN	2.53488	-0.935299	4.73799	8.6e-06	9.24e-05	3.20987
MGST2	-1.01114	5.05263	-4.73459	8.72e-06	9.33e-05	3.19723
DDX60	1.91882	5.86896	4.73371	8.75e-06	9.35e-05	3.19396
SLC11A1	1.74049	2.63361	4.73366	8.75e-06	9.35e-05	3.19378
KCNMB1	-1.66005	1.13293	-4.73224	8.8e-06	9.39e-05	3.1885
ENO2	1.90821	4.11002	4.72529	9.04e-06	9.62e-05	3.16271
GSTA1	-4.26265	-0.919084	-4.72486	9.06e-06	9.63e-05	3.16111
EPM2A	-1.05071	1.80428	-4.72399	9.09e-06	9.66e-05	3.15788
TCEA3	-2.04455	3.82391	-4.71926	9.26e-06	9.81e-05	3.14031
AC007906.2	-2.19841	0.210372	-4.71844	9.28e-06	9.83e-05	3.13729
MMRN1	-2.99269	0.889121	-4.71636	9.36e-06	9.91e-05	3.12958
MN1	1.41998	4.86197	4.71242	9.5e-06	0.000100357	3.11498
DSE	1.14489	6.14947	4.71137	9.54e-06	0.000100694	3.11108
TFF1	-2.84854	-3.0265	-4.70557	9.76e-06	0.000102759	3.0896
PBK	1.40221	3.38947	4.7052	9.78e-06	0.000102832	3.08821
AR	-2.35995	0.67223	-4.70215	9.89e-06	0.00010398	3.07692
QPCT	-1.6661	2.03921	-4.69872	1e-05	0.000105216	3.06424
ZC2HC1A	-1.15367	2.28038	-4.69791	1.01e-05	0.000105472	3.06122
MFHAS1	1.19085	5.71059	4.69503	1.02e-05	0.000106497	3.05059
SPDEF	-3.29614	-1.17672	-4.6922	1.03e-05	0.000107596	3.0401
CYP4F12	-2.98629	0.426344	-4.68957	1.04e-05	0.000108536	3.03041
PLXND1	1.0749	5.97038	4.68627	1.05e-05	0.000109854	3.0182
H2BC9	1.5343	-0.0964454	4.67602	1.09e-05	0.000113885	2.98034
TRIM59	1.02794	3.08907	4.67234	1.11e-05	0.00011535	2.96677
ESM1	2.32473	1.76566	4.66455	1.14e-05	0.000118705	2.93805
LYRM9	-1.49056	0.493662	-4.66133	1.16e-05	0.000120105	2.92618
TYMP	1.56433	8.27285	4.6578	1.17e-05	0.000121374	2.9132
SMIM4	-1.00237	2.22175	-4.65234	1.2e-05	0.000123625	2.8931
LIFR	-1.76135	2.66281	-4.64877	1.22e-05	0.000125157	2.87999
PKIA	-2.35754	2.14886	-4.64681	1.23e-05	0.000125938	2.87275
HOXC10	3.45865	0.921632	4.64679	1.23e-05	0.000125938	2.87268
TSPAN6	-1.07706	4.98971	-4.63953	1.26e-05	0.00012864	2.84603
RAP2B	1.05333	6.8229	4.63942	1.26e-05	0.00012864	2.8456
CYSLTR1	-1.68558	0.39684	-4.63328	1.29e-05	0.000131435	2.82307
ZNF347	-1.72542	1.03404	-4.63209	1.3e-05	0.000131944	2.8187
NTM	1.96977	2.49281	4.6311	1.3e-05	0.000132277	2.81508
MGAT4A	-1.43075	3.19059	-4.63106	1.3e-05	0.000132277	2.81494
TNC	1.96704	9.02542	4.62477	1.33e-05	0.000135233	2.79184
ADCY5	-2.38874	0.486158	-4.62395	1.34e-05	0.000135564	2.78884
SAMD9	1.94713	7.20213	4.61864	1.37e-05	0.000137966	2.76939
ZFP36	-1.28919	8.19069	-4.61846	1.37e-05	0.000137966	2.76872
RAI2	-1.89849	1.35368	-4.61678	1.38e-05	0.000138563	2.76258
ZNFX1	1.0132	6.52656	4.6149	1.39e-05	0.000139395	2.7557
ANK2	-2.39127	1.46869	-4.61464	1.39e-05	0.000139413	2.75473
GREM1	2.47877	4.81156	4.61377	1.39e-05	0.000139782	2.75154
SOX15	1.48915	5.77663	4.61293	1.4e-05	0.000140135	2.74846
GPRASP2	-1.17417	2.26231	-4.61149	1.4e-05	0.00014071	2.74322
GP2	-2.5416	-3.45406	-4.61046	1.41e-05	0.00014117	2.73945
SGK2	-2.34094	-1.99996	-4.6099	1.41e-05	0.000141377	2.73738
MT-CYB	-1.30072	10.9412	-4.60932	1.42e-05	0.000141591	2.73526
PECR	-1.29356	1.69438	-4.60837	1.42e-05	0.000141728	2.73181
GALNT17	-1.88475	0.143898	-4.60834	1.42e-05	0.000141728	2.73167
GAS7	-1.6944	4.48093	-4.60412	1.44e-05	0.000143842	2.71623
LRFN4	1.19057	4.06574	4.60264	1.45e-05	0.000144455	2.71085
FAXDC2	-1.93883	2.17638	-4.60059	1.46e-05	0.000145499	2.70333
ASPHD2	1.14035	2.55464	4.59985	1.47e-05	0.000145811	2.70063
SORT1	-1.34165	5.96045	-4.59954	1.47e-05	0.000145882	2.69949
PPP1R3C	-2.67503	2.5787	-4.59861	1.48e-05	0.000146198	2.6961
MAP6	-1.93125	-0.624596	-4.59625	1.49e-05	0.000147425	2.68748
MT-ND3	-1.22128	8.93608	-4.59266	1.51e-05	0.000148873	2.67438
SNRPN	-1.78584	3.39211	-4.59146	1.52e-05	0.000149427	2.67001
SPRY1	-1.25392	4.2016	-4.59125	1.52e-05	0.000149446	2.66923
MITF	-1.5679	2.09829	-4.59055	1.52e-05	0.000149742	2.66668
SKP2	1.05425	4.91947	4.59014	1.52e-05	0.000149872	2.6652
PROC	2.07926	0.25439	4.58984	1.53e-05	0.000149945	2.66408
ZBTB47	-1.13324	3.52716	-4.58589	1.55e-05	0.000152021	2.64967
COL4A6	2.36433	4.48064	4.58511	1.55e-05	0.000152354	2.64683
LMF1	-1.21686	2.72573	-4.58477	1.56e-05	0.000152354	2.64558
RPRM	-2.47417	-1.79188	-4.58365	1.56e-05	0.000152804	2.6415
SHISAL1	2.23925	2.66946	4.58206	1.57e-05	0.000153525	2.63571
FST	2.02781	5.87952	4.57988	1.58e-05	0.000154687	2.62774
DQX1	1.60044	1.99079	4.57973	1.59e-05	0.000154687	2.62722
ACSS3	-2.12687	0.118157	-4.57831	1.59e-05	0.000155319	2.62204
GADD45G	-1.84272	1.14804	-4.57691	1.6e-05	0.00015598	2.61693
ANGPTL7	-2.72757	-2.19711	-4.57684	1.6e-05	0.00015598	2.61669
MMP3	3.33718	5.02757	4.5741	1.62e-05	0.000157304	2.60669
KCNK5	-1.5998	2.80503	-4.5735	1.62e-05	0.000157554	2.60453
RAB17	-2.12669	0.55502	-4.56997	1.65e-05	0.00015959	2.59166
ZNF596	-1.02206	0.34232	-4.56868	1.65e-05	0.000160269	2.58697
DMBT1	-4.87381	0.0317613	-4.56363	1.69e-05	0.000162953	2.56857
TNFSF4	1.74307	1.33278	4.56222	1.7e-05	0.000163498	2.56346
HIF1A	1.02044	8.44307	4.56161	1.7e-05	0.00016377	2.56123
LUM	2.03661	7.54997	4.55833	1.72e-05	0.000165607	2.54933
TMEM92	2.00049	1.46184	4.55313	1.76e-05	0.000168738	2.53042
TEC	-1.42542	1.14491	-4.55157	1.77e-05	0.000169596	2.52475
SMIM5	-2.79348	1.19639	-4.55078	1.77e-05	0.000169877	2.52189
CREB3L4	-1.08503	2.73466	-4.54687	1.8e-05	0.00017197	2.50768
GIPC2	-2.44112	0.145716	-4.54424	1.82e-05	0.000172998	2.49817
MT1M	-2.02014	0.198005	-4.54244	1.83e-05	0.000173593	2.49162
GPR161	1.06072	4.09757	4.54236	1.83e-05	0.000173593	2.49135
LDOC1	-2.37994	2.52009	-4.54229	1.83e-05	0.000173593	2.49108
SLC25A25	-1.26229	4.71806	-4.54179	1.83e-05	0.000173811	2.48925
IRX6	-2.69632	-1.46804	-4.53437	1.89e-05	0.000178437	2.46237
EPB41L4A	-1.81023	2.19362	-4.53262	1.9e-05	0.000179511	2.45603
P4HA3	2.1964	1.07779	4.5312	1.91e-05	0.00018015	2.45089
MYOM1	-2.81915	0.732339	-4.52915	1.92e-05	0.000181263	2.44346
CP	-3.21785	1.6557	-4.52902	1.92e-05	0.000181263	2.443
ONECUT2	2.0926	-0.496583	4.522	1.98e-05	0.000185926	2.41758
C1QL1	1.9868	-0.120537	4.52166	1.98e-05	0.000186041	2.41637
SNTB1	-1.50033	3.10273	-4.5212	1.98e-05	0.000186242	2.41471
ACBD4	-1.1049	1.52669	-4.51327	2.04e-05	0.00019106	2.38603
CMTM8	-1.19081	1.44271	-4.51182	2.05e-05	0.000191988	2.3808
ZNF433	-1.96313	0.213824	-4.51059	2.06e-05	0.000192723	2.37635
SLAMF9	2.61169	-0.478458	4.51047	2.07e-05	0.000192723	2.37591
TMC7	1.58562	2.0042	4.51004	2.07e-05	0.00019291	2.37437
ARSI	2.11724	4.34384	4.50794	2.09e-05	0.000194205	2.36676
KRT17	2.34559	12.3447	4.50583	2.1e-05	0.000195376	2.35918
PPP4R4	2.24923	1.43684	4.50354	2.12e-05	0.00019678	2.35091
DEFB1	-2.91279	3.6478	-4.50332	2.12e-05	0.00019678	2.35011
GULP1	-2.2252	1.6806	-4.50326	2.12e-05	0.00019678	2.34988
IL33	-3.1056	2.90199	-4.50258	2.13e-05	0.000197032	2.34743
BMPR1B	1.9156	2.00582	4.50025	2.15e-05	0.000198647	2.33905
DLX2	2.19132	0.315156	4.49838	2.16e-05	0.000199474	2.3323
IFI35	1.3982	5.32943	4.49829	2.16e-05	0.000199474	2.33197
SASH1	-1.65282	5.20698	-4.49822	2.16e-05	0.000199474	2.33169
GLB1L2	-2.78802	0.934653	-4.49813	2.16e-05	0.000199474	2.33139
TSPAN10	1.79957	2.63099	4.49435	2.2e-05	0.000202082	2.31776
SUGCT	1.55691	2.36125	4.49419	2.2e-05	0.000202082	2.31719
PLN	-2.53711	-0.446184	-4.4931	2.21e-05	0.00020279	2.31326
ATP8A1	-1.7994	1.72209	-4.48481	2.28e-05	0.000208719	2.2834
TNFRSF12A	1.29846	6.12669	4.48464	2.28e-05	0.000208719	2.28279
GFI1	1.57827	0.758028	4.48412	2.28e-05	0.000208998	2.28091
WDR31	-1.14986	1.4599	-4.4833	2.29e-05	0.000209516	2.27795
CDON	-1.30635	1.79207	-4.48282	2.29e-05	0.000209758	2.27624
RBKS	-1.02719	1.5859	-4.48255	2.3e-05	0.00020984	2.27526
TMEM8B	-1.4861	2.33952	-4.48222	2.3e-05	0.000209966	2.27408
FADS3	1.45548	3.76323	4.47928	2.32e-05	0.000212043	2.2635
SATB1	-1.39195	3.56657	-4.47614	2.35e-05	0.000214442	2.2522
ACSF2	-1.11237	3.52203	-4.47597	2.35e-05	0.000214442	2.25159
COL6A2	1.90353	8.80065	4.47345	2.38e-05	0.000216213	2.24255
LHX9	2.4639	-1.4358	4.47133	2.4e-05	0.000217817	2.23492
MGST1	-3.86141	2.56586	-4.47062	2.4e-05	0.000218261	2.23238
ZC2HC1C	-1.16403	0.222459	-4.46709	2.43e-05	0.000220737	2.21969
MUC15	-3.16528	2.4053	-4.46286	2.47e-05	0.000223612	2.20452
HIGD1A	-1.00284	5.32476	-4.46147	2.49e-05	0.000224647	2.19952
POLE2	1.02707	2.58593	4.45944	2.51e-05	0.000226091	2.19223
HTRA3	2.13208	4.8532	4.45913	2.51e-05	0.000226212	2.19112
HOXB7	3.05839	1.00853	4.45866	2.51e-05	0.000226319	2.18946
PLOD2	1.3279	5.85495	4.45587	2.54e-05	0.000228283	2.17945
TMEM38A	-1.90971	1.93358	-4.45239	2.57e-05	0.000230861	2.16698
SLC12A2	-1.2134	5.14577	-4.4488	2.61e-05	0.000233715	2.15411
MEAK7	1.18116	5.81168	4.44384	2.66e-05	0.000237226	2.13636
AIF1L	-1.77412	4.66612	-4.43963	2.7e-05	0.000240716	2.1213
F2RL3	1.36209	1.01518	4.43899	2.71e-05	0.000241149	2.119
LAMP5	2.3317	1.50483	4.43386	2.76e-05	0.000245545	2.10065
SPNS2	-1.96537	4.26076	-4.43178	2.78e-05	0.00024701	2.09322
MEIS2	-1.25492	3.01991	-4.42893	2.81e-05	0.000248893	2.08304
FAAH2	-1.44187	2.17421	-4.42687	2.83e-05	0.000250514	2.0757
ITGA1	1.43678	4.57055	4.42664	2.84e-05	0.000250578	2.07486
KRT9	1.80782	1.0068	4.42618	2.84e-05	0.00025085	2.07324
CLDN23	-1.41529	1.52022	-4.42073	2.9e-05	0.00025541	2.05378
HOXC4	1.87339	0.0403216	4.41759	2.93e-05	0.000257941	2.04258
AQP1	-1.43073	5.85473	-4.41738	2.94e-05	0.000257941	2.04181
STRA6	2.67514	2.19283	4.41728	2.94e-05	0.000257941	2.04148
ELF5	-3.47249	0.120601	-4.41449	2.97e-05	0.000260335	2.03154
SOX11	2.3269	-0.0781239	4.41428	2.97e-05	0.00026038	2.03079
IL20RB	2.10425	6.38254	4.41161	3e-05	0.000262524	2.02124
MAL	-4.19874	2.99159	-4.41006	3.02e-05	0.000263889	2.01574
PCDH17	1.64688	2.52247	4.40956	3.02e-05	0.000264224	2.01395
DIRAS3	-1.67597	-0.045908	-4.40419	3.08e-05	0.000269262	1.99485
PKNOX2	-2.05072	-0.105026	-4.40318	3.1e-05	0.000270126	1.99123
H3C8	1.78966	-0.592059	4.40213	3.11e-05	0.000271023	1.9875
TSPYL5	-1.74703	1.58035	-4.40102	3.12e-05	0.000271817	1.98356
KNDC1	-2.34162	-0.480755	-4.40061	3.13e-05	0.000272066	1.98211
EFHD1	-1.69577	1.19388	-4.39992	3.13e-05	0.000272445	1.97963
SLC19A2	-1.01955	3.53184	-4.39899	3.15e-05	0.000273026	1.97635
KCNK1	1.1507	5.33058	4.39878	3.15e-05	0.000273026	1.9756
DDX11	1.02917	3.94752	4.39824	3.15e-05	0.000273323	1.97368
PXMP4	-1.08727	3.90783	-4.3958	3.18e-05	0.000275504	1.96498
TCN1	-3.87068	2.42676	-4.39439	3.2e-05	0.000276567	1.95998
PAX5	2.38611	0.768584	4.39428	3.2e-05	0.000276567	1.95959
FOXE1	2.80922	4.72729	4.39249	3.22e-05	0.000277917	1.95324
CREG2	2.44776	1.0091	4.39172	3.23e-05	0.00027855	1.9505
CAPN3	-1.98676	-0.869147	-4.38979	3.26e-05	0.000280406	1.94363
HAS3	2.02843	7.23263	4.38866	3.27e-05	0.000281255	1.93961
MLXIPL	-2.59376	-1.32864	-4.3878	3.28e-05	0.000281983	1.93658
RERG	-2.3109	0.144517	-4.38565	3.31e-05	0.000283921	1.92893
RSAD2	2.59298	4.73065	4.38342	3.33e-05	0.000285954	1.92102
MUC21	-5.07607	0.711813	-4.38124	3.36e-05	0.000287933	1.9133
ZNF697	1.1122	2.80606	4.38049	3.37e-05	0.000288413	1.91061
LMO3	-2.42168	-1.83344	-4.38011	3.38e-05	0.000288534	1.90928
MISP	2.44325	3.4217	4.37956	3.38e-05	0.000288718	1.90732
SPARCL1	-1.66884	5.73954	-4.37627	3.42e-05	0.000291761	1.89567
MIA	-2.58581	-2.70091	-4.37319	3.46e-05	0.000294963	1.88474
SLC19A1	1.02978	3.52579	4.3727	3.47e-05	0.000295321	1.88302
NUDT12	-1.07136	2.90491	-4.37187	3.48e-05	0.000295733	1.88006
SLC6A4	-2.65356	-1.29229	-4.37066	3.5e-05	0.000296693	1.87579
MACROD1	-1.46137	3.11556	-4.36992	3.51e-05	0.000297027	1.87314
EPSTI1	2.05311	4.8866	4.36982	3.51e-05	0.000297027	1.87279
EGR1	-1.39532	8.07208	-4.3673	3.54e-05	0.00029955	1.86387
NLRC5	1.32712	5.85123	4.36163	3.62e-05	0.000305408	1.84381
SOD3	-1.60573	2.96424	-4.35956	3.64e-05	0.000307586	1.83651
GRAMD1C	-1.55196	1.95122	-4.35446	3.71e-05	0.000313306	1.81847
KRT6A	2.61614	13.1436	4.35417	3.72e-05	0.000313467	1.81742
TENM3	2.05265	4.00903	4.35379	3.72e-05	0.000313717	1.8161
ZNF420	-1.57457	1.12514	-4.35023	3.77e-05	0.000317341	1.80352
EVA1C	-1.5036	3.61333	-4.34884	3.79e-05	0.000318796	1.79862
PTPRN	2.50704	-0.749451	4.34639	3.83e-05	0.000321149	1.78997
NCF2	1.21034	4.78221	4.34417	3.86e-05	0.00032344	1.78211
OCIAD2	1.01672	5.65609	4.34384	3.86e-05	0.000323642	1.78096
PIGR	-4.90387	0.985297	-4.34354	3.87e-05	0.000323819	1.77988
ICAM5	1.7317	0.462614	4.34325	3.87e-05	0.000323969	1.77888
DUSP23	-1.21008	4.28949	-4.34287	3.88e-05	0.000324237	1.77754
HYKK	-1.04077	0.707896	-4.34135	3.9e-05	0.000325503	1.77218
CD80	1.69456	-0.050727	4.34092	3.91e-05	0.00032584	1.77064
BOP1	1.02143	6.587	4.34025	3.92e-05	0.000326319	1.7683
ANG	-1.33787	1.14349	-4.34009	3.92e-05	0.000326319	1.76772
AJUBA	1.22066	6.20488	4.34005	3.92e-05	0.000326319	1.76758
PROCR	1.3846	4.60973	4.33823	3.95e-05	0.000327952	1.76118
CCL2	-1.82887	4.02644	-4.33732	3.96e-05	0.00032887	1.75798
ABCB1	-1.58636	0.41138	-4.3347	4e-05	0.000331895	1.74874
SFRP1	-3.25501	4.58953	-4.33331	4.02e-05	0.000333235	1.74381
RGS20	2.07752	2.67344	4.33235	4.03e-05	0.000334185	1.74045
PARD3B	-1.54476	2.04067	-4.33207	4.04e-05	0.000334185	1.73946
PM20D1	-2.22019	-2.81869	-4.33051	4.06e-05	0.000335927	1.73398
PGF	1.60281	4.90192	4.32884	4.09e-05	0.000337433	1.72808
KRT7	-2.94932	3.69189	-4.32713	4.11e-05	0.000338998	1.72205
SPRED3	1.3082	1.00547	4.32664	4.12e-05	0.000339361	1.72034
DDIT4	1.44717	7.15509	4.32652	4.12e-05	0.000339361	1.71993
SEMA7A	1.1238	3.835	4.32544	4.14e-05	0.000340529	1.71613
UBE2L6	1.14908	6.99656	4.32403	4.16e-05	0.000342117	1.71117
CYP27C1	2.26328	2.59835	4.32219	4.19e-05	0.00034387	1.70468
MT-CO1	-1.09022	12.4728	-4.31733	4.26e-05	0.000349519	1.68759
ANGPT2	1.39337	3.43197	4.31582	4.29e-05	0.000351077	1.68229
PANK1	-1.20142	2.18984	-4.31023	4.38e-05	0.000358015	1.66265
MAP3K8	-1.12915	3.29325	-4.30987	4.38e-05	0.000358056	1.66138
RELT	1.08763	3.63127	4.30624	4.44e-05	0.000362304	1.64865
GNE	-1.20153	3.96303	-4.30604	4.45e-05	0.000362365	1.64794
TMEM139	-2.39919	-1.46596	-4.30486	4.47e-05	0.000363747	1.64379
LRRC8A	1.02716	7.83426	4.30417	4.48e-05	0.00036446	1.64139
NAALADL2	-2.11684	0.686783	-4.30355	4.49e-05	0.000365096	1.6392
CD164L2	-2.07486	0.860131	-4.30045	4.54e-05	0.000369079	1.62833
KLF2	-1.30783	2.88602	-4.29678	4.6e-05	0.000373502	1.61547
MAMDC2	-1.94505	1.29881	-4.29404	4.65e-05	0.000376256	1.60585
CHSY3	1.52391	1.40603	4.2939	4.65e-05	0.000376256	1.60536
SARM1	-1.34566	0.660109	-4.29024	4.71e-05	0.000380899	1.59257
FHAD1	2.05709	0.795729	4.2887	4.74e-05	0.000382653	1.58718
PPP1R3F	-1.05407	1.5792	-4.28583	4.79e-05	0.000386067	1.57711
TMPRSS2	-3.74018	1.28569	-4.27899	4.91e-05	0.000394379	1.55319
SPAG16	-1.67137	2.24528	-4.27858	4.92e-05	0.000394529	1.55176
CRYAB	-2.32344	5.74629	-4.27668	4.96e-05	0.000396401	1.54514
ALDH3B1	-1.08904	3.25079	-4.27639	4.96e-05	0.000396587	1.5441
PHYH	-1.43305	3.07694	-4.27594	4.97e-05	0.000396822	1.54254
N4BP2L1	-1.33132	1.9123	-4.2739	5.01e-05	0.000399593	1.53542
ODAM	-3.73205	-2.32591	-4.2736	5.01e-05	0.000399814	1.53436
FOXL1	2.02454	0.655674	4.27046	5.07e-05	0.000404013	1.52341
LRIG1	-1.44889	4.34214	-4.27002	5.08e-05	0.000404209	1.52189
HEYL	1.49402	2.79374	4.26904	5.1e-05	0.000405219	1.51847
NRIP2	-1.31546	0.0473825	-4.26876	5.1e-05	0.000405416	1.51748
GYPC	-1.37748	2.75686	-4.267	5.14e-05	0.00040782	1.51135
LOXL3	1.18286	1.85854	4.2664	5.15e-05	0.000408278	1.50923
LRP8	1.3138	4.07465	4.26568	5.16e-05	0.000409132	1.50672
C2	1.56584	3.67167	4.25852	5.3e-05	0.000418891	1.48177
SPTSSB	-2.77111	1.29789	-4.25694	5.33e-05	0.000420626	1.47628
FOXA1	-2.7425	1.50763	-4.25202	5.43e-05	0.000427604	1.45912
TAP1	1.35088	7.8818	4.24836	5.5e-05	0.000433152	1.4464
CTLA4	1.75578	1.00736	4.24221	5.63e-05	0.00044134	1.42501
CD1C	-1.78521	0.376684	-4.24196	5.63e-05	0.0004415	1.42414
PRDX2	-1.14871	6.94948	-4.24053	5.66e-05	0.000443582	1.41917
CLGN	-2.17574	-1.53464	-4.23743	5.73e-05	0.000448418	1.40839
NECTIN1	1.25677	8.987	4.23686	5.74e-05	0.000449107	1.40641
CLIC5	-2.12905	0.478135	-4.23601	5.76e-05	0.000450189	1.40347
CLIC6	-2.2155	1.26057	-4.23575	5.76e-05	0.000450189	1.40257
PBX1	-2.13034	4.3163	-4.23342	5.81e-05	0.000453809	1.39448
ZNF91	-1.64261	2.09612	-4.23277	5.83e-05	0.000454471	1.39221
FGF7	-2.39851	1.19451	-4.23256	5.83e-05	0.000454496	1.39149
NEBL	-1.76917	5.07504	-4.23124	5.86e-05	0.000456207	1.38689
ISM1	-1.94619	1.75251	-4.22843	5.92e-05	0.000459634	1.37714
COL24A1	1.68079	0.471265	4.22818	5.92e-05	0.000459634	1.3763
CRAT	-1.83568	4.46035	-4.22815	5.92e-05	0.000459634	1.37619
LRG1	-2.06067	4.09753	-4.22774	5.93e-05	0.00046007	1.37478
ENPEP	1.61961	2.54348	4.22136	6.07e-05	0.00046943	1.35263
STRIT1	-2.69627	-2.98692	-4.21998	6.1e-05	0.000471056	1.34787
THY1	1.82037	5.64506	4.21807	6.15e-05	0.000473825	1.34125
SCG5	1.91965	0.674676	4.2164	6.19e-05	0.000475704	1.33545
GALNT12	-1.57464	2.5526	-4.21563	6.2e-05	0.00047653	1.33279
CYP2U1	-1.17855	1.7033	-4.215	6.22e-05	0.000477116	1.3306
CASQ1	-3.26882	-1.32869	-4.2122	6.28e-05	0.000481368	1.32094
NXPH3	-1.43231	-0.500234	-4.21213	6.28e-05	0.000481368	1.32068
PRG4	-2.53985	-1.16336	-4.2108	6.31e-05	0.000483449	1.31609
ST6GALNAC1	-2.4827	2.61747	-4.20873	6.36e-05	0.000486079	1.30892
PHGDH	-1.63203	5.08702	-4.20393	6.47e-05	0.000492561	1.29233
KRT33A	-2.25105	-2.2982	-4.20264	6.5e-05	0.000494633	1.28786
PXDN	1.94422	5.96778	4.20038	6.56e-05	0.00049846	1.28006
SLC27A1	-1.01551	3.73102	-4.19876	6.6e-05	0.000501151	1.27447
ZIK1	-1.24845	0.252121	-4.19759	6.63e-05	0.000503022	1.27044
ENPP5	-2.7284	-0.635637	-4.19659	6.65e-05	0.000504602	1.26697
PDCD4	-1.07126	6.52955	-4.1926	6.75e-05	0.000511446	1.25322
NFIB	-1.3076	5.22021	-4.1892	6.83e-05	0.000516087	1.24149
STRIP2	1.51413	2.83597	4.18908	6.83e-05	0.000516087	1.24109
USP54	-1.05478	4.44674	-4.189	6.84e-05	0.000516087	1.24081
RGS4	2.17591	1.84757	4.18832	6.85e-05	0.000517022	1.23844
CTNNA3	-2.37936	-2.34453	-4.18617	6.91e-05	0.000520809	1.23104
ARHGAP6	-1.3964	0.17457	-4.18428	6.96e-05	0.000523852	1.22453
COL16A1	1.26399	6.47518	4.18263	7e-05	0.00052674	1.21883
ARNTL2	1.29311	6.58725	4.18206	7.01e-05	0.000527265	1.21689
CGREF1	-2.4794	0.857648	-4.1784	7.11e-05	0.000533218	1.20428
ITPR1	-1.17382	3.81614	-4.17762	7.13e-05	0.000534458	1.20158
CAVIN3	1.24766	3.91637	4.17409	7.22e-05	0.000540715	1.18946
BCAT1	1.91806	4.23542	4.17201	7.27e-05	0.000543762	1.18228
CDR2L	1.09529	4.35186	4.17081	7.3e-05	0.000545837	1.17819
C1orf115	-1.49744	2.73823	-4.17033	7.32e-05	0.000546506	1.17653
SUOX	-1.00709	3.6779	-4.1696	7.34e-05	0.000547672	1.17402
ARRB1	-1.19761	3.14929	-4.1684	7.37e-05	0.000549498	1.16988
ABCD1	1.0668	3.98111	4.16751	7.39e-05	0.000550414	1.16682
SHOC1	1.66006	0.170708	4.16716	7.4e-05	0.000550746	1.16563
TNS4	1.4175	8.36739	4.16705	7.41e-05	0.000550746	1.16526
LAMB1	1.06162	7.21977	4.16422	7.48e-05	0.000555492	1.15552
SMCO1	-1.90105	-2.94703	-4.16412	7.48e-05	0.000555492	1.15518
RHOU	-1.37364	2.7269	-4.16191	7.55e-05	0.000559632	1.14759
ASB9	-1.09545	-0.139468	-4.16052	7.58e-05	0.000561932	1.14281
FOLR1	-3.21177	-1.28369	-4.15671	7.69e-05	0.000568558	1.12976
OSR2	1.36071	3.15416	4.15583	7.71e-05	0.000569787	1.12674
PALMD	-1.26838	5.2673	-4.15539	7.73e-05	0.000570114	1.12522
C4orf19	-2.58441	-0.279455	-4.15219	7.82e-05	0.000575872	1.11425
DDIAS	1.17877	3.1795	4.14722	7.96e-05	0.000584645	1.09721
EMILIN2	1.18204	4.04789	4.14415	8.05e-05	0.00059015	1.08672
FBXO40	-2.49074	-2.94264	-4.14315	8.08e-05	0.00059192	1.0833
CHST7	1.34269	2.16108	4.14288	8.08e-05	0.000591969	1.08235
WSCD1	-1.53278	-0.491798	-4.14237	8.1e-05	0.000592438	1.08063
PLAAT1	-2.35849	-0.767429	-4.14166	8.12e-05	0.000593354	1.0782
GGT6	-2.17348	4.14736	-4.13686	8.26e-05	0.00060283	1.06178
RTL5	-1.45402	0.759574	-4.13524	8.31e-05	0.000605453	1.05623
SEMA4F	1.0249	3.16746	4.1338	8.35e-05	0.000608297	1.05132
CCNE2	1.15575	1.99516	4.1334	8.37e-05	0.000608875	1.04993
DLX6	2.44723	-0.405941	4.13317	8.37e-05	0.00060907	1.04915
ZBTB18	-1.0406	3.16301	-4.12905	8.5e-05	0.000616959	1.03507
FAM111B	1.32605	3.81786	4.12488	8.63e-05	0.000625994	1.02086
HSPB8	-1.72644	5.73886	-4.1235	8.67e-05	0.000628817	1.01612
TC2N	-1.40648	4.73208	-4.12275	8.7e-05	0.000630192	1.01358
C11orf71	-1.19451	1.67948	-4.12144	8.74e-05	0.000632861	1.00911
OLFML2B	1.76949	4.71761	4.11934	8.8e-05	0.000637035	1.00194
PKP1	1.80715	10.584	4.11823	8.84e-05	0.000639276	0.998146
MDFI	1.10119	5.9155	4.11662	8.89e-05	0.000642006	0.992683
ZFP28	-1.83696	0.370718	-4.11397	8.98e-05	0.00064786	0.983634
RSPO3	-2.01783	-0.0375923	-4.10897	9.14e-05	0.000658982	0.966608
ANO5	-2.67933	-1.15607	-4.10824	9.16e-05	0.000660382	0.964127
ABRA	-2.28622	-3.00947	-4.10748	9.19e-05	0.000661853	0.961547
AFF3	-1.80335	-0.590877	-4.10666	9.22e-05	0.000663477	0.958757
TNS2	-1.10743	4.25119	-4.10628	9.23e-05	0.000664054	0.957458
CH25H	-1.80212	1.86348	-4.10273	9.35e-05	0.000670585	0.945358
SCNN1A	-2.1447	5.51577	-4.10147	9.39e-05	0.00067295	0.941083
SLC7A11	2.51076	4.7651	4.10119	9.4e-05	0.000673092	0.940148
CRACR2B	-1.83865	1.24686	-4.09803	9.51e-05	0.00068031	0.929391
FOLR3	2.57875	-0.290416	4.09742	9.53e-05	0.000681456	0.927328
F8	-1.05863	2.24277	-4.09395	9.65e-05	0.000688919	0.915528
CD70	2.05812	0.440403	4.08829	9.85e-05	0.000700706	0.896307
SPP1	3.07533	6.20297	4.08644	9.91e-05	0.000703959	0.890049
DDIT4L	-3.13282	-0.107921	-4.08143	0.000100917	0.000714825	0.873051
GJB5	1.46487	6.03661	4.08135	0.000100947	0.000714825	0.872773
GJB4	2.04691	2.99168	4.07814	0.000102115	0.000722741	0.861915
CEACAM1	-2.03444	4.21067	-4.07765	0.000102297	0.000723664	0.860241
FADD	1.27177	4.02106	4.07617	0.000102841	0.000726793	0.855233
NWD1	-2.10698	-0.993051	-4.07534	0.000103146	0.000728225	0.852438
NOVA1	-1.89462	-1.03654	-4.07189	0.000104432	0.00073657	0.840755
GBP5	2.9311	4.96272	4.07146	0.000104593	0.000737335	0.839307
PARD6A	-1.18275	0.157316	-4.06897	0.000105534	0.000743232	0.83086
HMGN5	-1.6	1.1873	-4.06779	0.000105981	0.000745645	0.826869
NOXA1	-1.6911	1.31623	-4.06674	0.000106377	0.000746584	0.823351
RPS6KL1	-1.62663	-0.249981	-4.06641	0.000106505	0.00074711	0.822222
AKAP7	-1.0799	1.43199	-4.06597	0.000106672	0.000747915	0.82074
ANXA9	-1.80487	2.29747	-4.06559	0.000106817	0.00074856	0.819463
KRCC1	-1.04747	4.07375	-4.06312	0.00010777	0.000754084	0.811085
PPM1K	-1.18435	3.05748	-4.06311	0.00010777	0.000754084	0.811081
PLEKHS1	-3.08908	-1.59817	-4.06255	0.000107988	0.000754853	0.809181
ZNF396	-1.34691	-0.411163	-4.06152	0.000108388	0.000756217	0.80569
KALRN	-1.39285	3.46502	-4.06013	0.000108931	0.000759256	0.800983
ZNF470	-1.63398	0.522302	-4.05991	0.000109017	0.000759482	0.80024
ZNF853	-1.76287	1.07942	-4.05956	0.000109151	0.000760043	0.799081
HPGD	-2.42509	2.64321	-4.05657	0.000110328	0.000766555	0.788967
CHL1	-3.15564	2.41509	-4.05597	0.000110563	0.000767249	0.786956
PCDHGB6	-1.51203	0.111847	-4.05445	0.000111166	0.000771055	0.781831
ADCY6	-1.31373	3.51729	-4.05335	0.000111604	0.00077334	0.778121
H2BC12	1.35581	4.29049	4.05189	0.000112192	0.000777032	0.773172
FBP2	-2.31564	-2.36714	-4.05045	0.00011277	0.000779139	0.768325
MYH10	1.08312	6.10556	4.05001	0.000112945	0.00077959	0.766862
CSMD2	2.22356	0.520521	4.04772	0.000113877	0.000785259	0.759117
SYDE2	-1.5232	0.0224819	-4.0451	0.000114948	0.000791108	0.750294
ZNF793	-2.02736	0.0886615	-4.04443	0.000115223	0.000792622	0.748037
ZNF837	-1.0783	0.225861	-4.04305	0.00011579	0.000795615	0.74341
P3H4	1.29634	4.34411	4.04297	0.000115827	0.000795615	0.743115
TNS1	-1.31652	6.13711	-4.03811	0.000117853	0.000808363	0.726768
RASL11A	-1.56102	1.32432	-4.03648	0.000118542	0.000812306	0.721273
LACRT	-1.82105	-4.06819	-4.03626	0.000118636	0.000812557	0.720528
GPR27	-2.3324	-0.25915	-4.03596	0.00011876	0.000813015	0.719542
ZNF649	-1.24114	2.06255	-4.03462	0.00011933	0.000815116	0.71503
CYB5A	-1.56067	4.08004	-4.03377	0.000119695	0.000816658	0.712157
TRIM55	-2.60778	-1.63928	-4.03104	0.000120864	0.000823848	0.702993
UBXN10	-1.82596	-0.149428	-4.02928	0.000121625	0.000828242	0.697077
AFAP1L2	1.07575	5.82631	4.02857	0.000121935	0.000829952	0.694682
CSPG4	1.86856	6.43015	4.02843	0.000121994	0.000829958	0.694224
ECSCR	-1.17575	0.289014	-4.02786	0.000122242	0.000831243	0.692315
FLNA	1.01338	10.5449	4.02183	0.0001249	0.000847294	0.672044
TMEM125	-1.88898	2.09287	-4.01794	0.000126642	0.000857476	0.658994
IGFL2	2.83125	1.80375	4.0167	0.0001272	0.000860431	0.654856
TMEM158	1.39011	2.70415	4.01601	0.000127516	0.000862123	0.65252
ZSCAN16	-1.26983	0.282508	-4.01339	0.000128708	0.000869389	0.643756
CXCL12	-1.89462	4.45836	-4.01212	0.000129289	0.000872089	0.639511
ACTG2	-2.21282	2.03508	-4.01175	0.000129463	0.000872828	0.638248
SLC6A1	-1.86661	-1.16147	-4.01092	0.000129842	0.000874974	0.635488
RAG1	1.74454	1.67336	4.00804	0.000131181	0.000883157	0.625828
WWC1	-1.07603	5.10711	-4.00761	0.000131381	0.000883726	0.624395
RAI14	1.09723	5.79832	4.0045	0.000132844	0.000892591	0.613965
CFP	-1.47018	0.400229	-4.00438	0.000132896	0.000892591	0.613593
MYOZ1	-3.27883	-0.113954	-4.00381	0.00013317	0.000893771	0.611658
MANEAL	-1.82617	1.37266	-4.00324	0.000133436	0.000894649	0.609778
TGFA	1.17456	6.16952	4.00236	0.000133855	0.000896491	0.606821
NPNT	1.4893	5.55064	4.00152	0.000134254	0.000898737	0.604021
KLHDC7B	2.41898	3.0827	4.00075	0.000134621	0.000900344	0.601452
SMTN	1.02064	6.24939	4.00015	0.000134909	0.000901426	0.599435
ZNF880	-1.60229	0.858787	-3.99935	0.000135294	0.000903343	0.596756
PPP2R2C	1.82713	6.37668	3.99929	0.000135323	0.000903343	0.59655
CNTNAP3B	-1.57271	-0.440358	-3.99818	0.000135856	0.000906168	0.59285
CNN3	-1.00312	6.44439	-3.99057	0.000139575	0.000928233	0.567426
FOS	-1.56357	8.4924	-3.98692	0.000141393	0.000939445	0.555242
CGN	-1.53228	3.51249	-3.98351	0.000143111	0.000949973	0.543872
ADAM19	1.48835	4.40507	3.98203	0.000143862	0.000954066	0.538947
NBEA	-2.13621	0.265879	-3.98099	0.000144394	0.000956254	0.535474
MT-ND2	-1.11527	10.4623	-3.97994	0.000144933	0.00095893	0.531967
XAF1	1.72348	3.59488	3.97948	0.000145167	0.000960033	0.530446
ZNF253	-1.43222	0.624747	-3.97898	0.000145427	0.000960856	0.528764
GPX8	1.08739	4.18993	3.97812	0.00014587	0.000963341	0.525896
HHATL	-2.98991	-2.09854	-3.97729	0.000146301	0.000965316	0.523125
CALML6	-1.92073	-2.90115	-3.9762	0.000146865	0.000967664	0.519498
ETV2	-1.02773	-0.137872	-3.97531	0.000147326	0.000969799	0.516551
CCSER1	-2.07034	-0.933017	-3.9735	0.000148275	0.000974239	0.510511
PCDH1	-1.30564	5.63664	-3.97327	0.000148391	0.000974554	0.509772
RNF208	-1.60152	1.84494	-3.97241	0.000148845	0.000976633	0.506897
CES3	-1.89773	0.125908	-3.97131	0.000149427	0.000979547	0.503224
SLC37A1	-1.24602	3.39575	-3.97101	0.000149583	0.000979668	0.50224
SELP	-2.34816	1.13437	-3.97066	0.000149772	0.00098045	0.501056
PDGFD	-1.71284	1.36122	-3.9698	0.000150223	0.000982952	0.498225
LIPE	-1.50744	2.20405	-3.96939	0.000150445	0.000983953	0.496833
SPON2	1.23591	5.53256	3.96882	0.000150744	0.000985001	0.494966
LIMCH1	-1.89012	4.2294	-3.96788	0.000151251	0.000987859	0.491807
ABCA3	-1.86259	1.91075	-3.96316	0.000153794	0.00100308	0.476123
SULF1	1.97746	5.96074	3.96246	0.000154172	0.00100509	0.47381
GPR4	1.17183	2.24878	3.95978	0.000155638	0.00101241	0.46491
ZNF429	-1.80273	0.715552	-3.95929	0.000155908	0.00101362	0.463277
ATL1	-1.18599	1.90479	-3.95915	0.000155985	0.00101365	0.462811
ZNF331	-1.29578	2.74938	-3.95828	0.000156466	0.00101632	0.459914
GCNT2	-1.77217	1.47102	-3.95727	0.000157025	0.00101897	0.456559
PDE1A	-1.53606	-0.16395	-3.95606	0.000157695	0.00102243	0.452556
PDE6B	-1.5668	-0.410658	-3.95492	0.00015833	0.00102608	0.448772
CALB1	3.97654	0.118758	3.9536	0.00015907	0.0010304	0.444387
FTCDNL1	-1.39504	0.0399167	-3.95261	0.000159626	0.00103306	0.441108
CST5	-1.78565	-3.95796	-3.95153	0.000160235	0.00103653	0.437524
TCP11L2	-1.02651	3.01108	-3.94708	0.000162767	0.001051	0.42278
FITM1	-1.97262	-1.15309	-3.94627	0.000163234	0.00105305	0.420085
CAND2	-1.88425	0.634674	-3.94524	0.000163823	0.00105638	0.416697
S100A2	1.54914	10.2463	3.94075	0.000166436	0.0010711	0.401816
RNF213	1.06072	7.77625	3.94037	0.000166656	0.00107128	0.400572
ABCC6	-1.38304	0.0592973	-3.94026	0.000166726	0.00107128	0.400179
UCP3	-1.59203	-0.517384	-3.93999	0.00016688	0.00107171	0.399308
H4C9	1.27483	2.7128	3.93846	0.000167783	0.00107703	0.394232
ROBO2	-2.59923	0.157933	-3.93679	0.000168772	0.00108093	0.388711
SERPINA3	-2.33151	-1.98602	-3.93636	0.000169026	0.00108207	0.387293
RASD1	-1.85401	2.78844	-3.9357	0.000169418	0.00108409	0.385116
CXXC5	-1.08038	4.60834	-3.93556	0.000169503	0.00108414	0.384648
IKZF2	-1.52924	3.57881	-3.93429	0.000170259	0.00108745	0.380459
LDB3	-2.95535	0.425921	-3.93269	0.000171221	0.00109217	0.375166
ARHGEF26	-2.15423	1.64934	-3.93008	0.000172798	0.00110125	0.366546
CNTD2	1.95251	-0.909451	3.92925	0.000173304	0.001103	0.363794
ERN2	-2.76963	-1.87678	-3.92773	0.000174236	0.00110843	0.358755
MYO5A	1.03523	6.28498	3.92488	0.000175987	0.00111838	0.349354
CELSR3	1.86715	2.47875	3.92255	0.000177434	0.00112575	0.341658
H2BC5	1.35759	3.32274	3.92211	0.000177707	0.00112698	0.340212
DNALI1	-1.60421	-0.00207127	-3.92183	0.00017788	0.00112758	0.339295
HKDC1	2.78978	0.210615	3.9186	0.000179909	0.00113689	0.328633
SQLE	1.33423	6.93988	3.91657	0.000181191	0.00114245	0.321963
TTLL3	-1.12137	1.05593	-3.91409	0.000182772	0.0011495	0.313796
PDGFRB	1.64811	6.19578	3.91406	0.000182794	0.0011495	0.313686
PAX1	-2.32692	-0.926179	-3.91338	0.000183233	0.00115169	0.311432
CAV1	1.48938	8.11314	3.91314	0.000183385	0.00115169	0.310651
AMIGO2	1.51856	4.34619	3.91246	0.000183821	0.00115392	0.308417
C6orf141	1.555	1.9366	3.91187	0.000184202	0.00115579	0.306476
THEMIS2	1.07924	4.20231	3.91097	0.000184786	0.00115843	0.303501
MMP17	1.14282	2.50999	3.90715	0.000187272	0.00117196	0.290939
ATP13A4	-3.0071	1.27362	-3.90568	0.000188243	0.00117751	0.286082
KRTAP3-2	-1.74661	-3.69904	-3.90275	0.000190184	0.00118808	0.276446
KBTBD12	-2.46917	-2.21005	-3.9026	0.000190278	0.00118815	0.275981
COLCA2	-1.93113	-0.578389	-3.90143	0.000191062	0.00119096	0.272115
FHL1	-2.20021	4.94084	-3.89835	0.000193129	0.00120278	0.262011
ZNF671	-1.18373	0.28946	-3.89552	0.000195052	0.0012136	0.252702
SMIM10	-1.30643	-0.139964	-3.89529	0.000195208	0.0012136	0.251952
KRT14	2.00054	13.2607	3.8951	0.000195337	0.00121388	0.251327
SYBU	-1.76308	1.93492	-3.89367	0.000196314	0.00121941	0.246641
SOX17	-1.22938	-0.0854875	-3.89156	0.000197768	0.00122684	0.239711
NXPH4	1.83827	3.73247	3.89091	0.000198221	0.00122911	0.237563
BMP2	1.37809	4.65459	3.888	0.000200247	0.00123897	0.228012
ADCY2	-2.46382	-0.0398082	-3.88372	0.000203258	0.00125596	0.213995
SLC7A2	-1.89292	2.91502	-3.88201	0.000204473	0.00126182	0.208401
ICA1L	-1.12184	0.323802	-3.88004	0.000205885	0.00126811	0.201939
HPGDS	-1.37813	-0.23859	-3.87716	0.000207963	0.00127734	0.192509
GALNT18	1.0262	5.14345	3.87522	0.000209372	0.00128445	0.186167
CLEC10A	-1.80429	1.41323	-3.87505	0.000209494	0.00128445	0.185621
HLA-B	1.18678	10.9081	3.87505	0.000209495	0.00128445	0.185616
MYEF2	-1.6654	-0.643243	-3.87432	0.00021003	0.00128717	0.183221
XPNPEP2	-1.85635	-0.795069	-3.87355	0.000210598	0.00128895	0.180688
ZNF701	-1.27995	0.623691	-3.87094	0.000212518	0.0012985	0.172166
ZNF717	-1.71377	0.207854	-3.86961	0.000213504	0.00130284	0.167819
SLC5A12	2.47726	-1.22494	3.86873	0.000214157	0.00130627	0.164954
HSD11B2	-1.59051	2.99007	-3.86702	0.000215441	0.00131297	0.159345
ULBP3	1.28699	1.15788	3.8667	0.000215677	0.00131384	0.158316
TMEM52	-1.97119	-0.0349205	-3.86556	0.000216538	0.00131832	0.154576
MAP2K6	-1.22242	1.14435	-3.86548	0.000216598	0.00131832	0.154316
IL2RA	1.54543	2.13556	3.86416	0.000217593	0.00132268	0.150012
LGALS1	1.38376	7.76774	3.86063	0.000220283	0.00133732	0.138483
SH3YL1	-1.10069	4.86713	-3.85907	0.000221481	0.00134402	0.13339
FKBP10	1.83694	5.57657	3.85708	0.000223017	0.00135161	0.126905
TLR6	1.1386	2.11949	3.85643	0.000223517	0.00135406	0.124804
GASK1A	-1.91874	-0.371494	-3.85583	0.000223987	0.00135575	0.122831
DEPDC7	1.07274	2.59772	3.85483	0.000224764	0.00135871	0.119585
DAGLA	-1.41484	1.35151	-3.85135	0.000227499	0.0013735	0.108232
BSPRY	-2.01175	3.36472	-3.85087	0.000227876	0.00137519	0.106681
ARFGEF3	-2.16306	1.30022	-3.8498	0.000228728	0.00137918	0.103178
ARSJ	1.3622	4.06627	3.84756	0.000230508	0.00138813	0.0959049
C10orf55	1.09389	0.749872	3.84588	0.000231862	0.00139569	0.09041
ZNF879	-1.40759	0.0379071	-3.84448	0.000232989	0.00140188	0.0858616
IL4I1	1.61721	2.58676	3.84359	0.000233711	0.00140503	0.0829588
TRPV3	2.00743	3.11235	3.84127	0.000235595	0.00141456	0.075427
WFDC2	-3.53305	2.08893	-3.84029	0.0002364	0.0014188	0.0722276
RBFOX1	-2.50951	-2.25972	-3.83777	0.000238474	0.00143004	0.0640328
EIF5A2	1.22374	3.26416	3.83663	0.000239414	0.00143503	0.0603438
LAMP3	1.53485	5.19481	3.83553	0.00024033	0.00143888	0.056761
PLEKHA7	-1.28172	3.89541	-3.8355	0.000240353	0.00143888	0.0566708
AEBP1	1.75969	7.61157	3.83264	0.000242746	0.00145015	0.0473804
SAMD14	1.13981	-0.175794	3.83057	0.000244486	0.00145993	0.040681
GJA3	2.01494	1.80615	3.82674	0.000247747	0.00147878	0.0282544
HES2	1.69627	5.73186	3.82405	0.000250067	0.00149138	0.0195165
ANKRD6	-1.54553	1.5818	-3.82244	0.000251462	0.00149907	0.0143
ANKRD35	-2.22316	2.754	-3.82075	0.000252937	0.00150596	0.00881573
FCGR2A	1.33299	4.55915	3.8187	0.000254734	0.0015141	0.00217601
ECHDC3	-2.2694	2.32584	-3.81846	0.000254943	0.0015141	0.00141026
FEZ1	1.60443	4.42028	3.8181	0.000255261	0.00151536	0.000239043
SCN2B	-1.90625	-0.589982	-3.81435	0.00025859	0.00153192	-0.0119088
ZNF254	-1.43308	1.86659	-3.8136	0.000259256	0.00153492	-0.0143181
LAMB4	-2.37388	-0.975384	-3.81354	0.000259312	0.00153492	-0.0145194
KIF15	1.01355	3.00561	3.81206	0.000260641	0.00154016	-0.0193131
PAQR8	-1.16839	2.17259	-3.81059	0.000261961	0.00154674	-0.0240492
PAX9	-1.81411	3.96258	-3.80484	0.000267208	0.00157314	-0.0426372
SIM2	-1.8082	1.13472	-3.80364	0.000268321	0.00157904	-0.0465311
FMO1	-1.80508	1.623	-3.80137	0.000270424	0.00158812	-0.0538471
IGF1	-1.71746	-0.976638	-3.79874	0.000272884	0.0016014	-0.0623321
PCDHGA9	-1.28378	0.373836	-3.79809	0.000273497	0.00160352	-0.064436
CEMIP	1.72924	4.84477	3.79669	0.000274822	0.00160996	-0.0689637
ZFYVE28	-1.10811	2.3829	-3.79251	0.000278803	0.00162993	-0.0824404
EDA2R	-1.6508	-0.213126	-3.79086	0.000280386	0.00163809	-0.0877441
SLC1A4	1.01595	6.32218	3.78908	0.000282112	0.00164588	-0.0934922
PSMB9	1.33162	5.8043	3.7884	0.000282768	0.00164904	-0.0956693
GPRC5B	-1.60835	3.17544	-3.78714	0.000284	0.00165486	-0.0997418
ROR2	1.92769	3.17648	3.78534	0.000285757	0.00166305	-0.105518
USP18	1.27956	3.16418	3.78248	0.000288581	0.00167401	-0.114731
SNED1	-1.69016	2.23488	-3.77531	0.000295769	0.00171151	-0.137772
SLC1A1	-1.86156	1.11316	-3.775	0.000296083	0.00171263	-0.138766
NAGS	1.13164	2.15835	3.77341	0.000297703	0.00172003	-0.143877
OCA2	-2.3638	-1.24506	-3.77269	0.000298443	0.00172348	-0.146202
IL31RA	1.44029	1.36768	3.7723	0.000298836	0.00172434	-0.147433
P3H2	1.95877	5.78459	3.7716	0.000299559	0.00172531	-0.149698
IQANK1	1.16695	5.27004	3.77143	0.000299732	0.00172531	-0.150236
TNFSF15	-1.39587	1.47576	-3.7692	0.000302029	0.00173712	-0.157385
POU6F1	-1.08228	1.44922	-3.76727	0.000304029	0.0017458	-0.163565
PHYHD1	-2.47552	1.81838	-3.76631	0.000305032	0.00174944	-0.166649
PKDCC	-2.02501	0.400967	-3.76439	0.000307051	0.00176031	-0.172824
CTSC	1.07787	8.01386	3.76385	0.000307613	0.00176282	-0.174536
LPAR3	1.28245	4.93014	3.76123	0.000310391	0.00177444	-0.182952
ALDH1A2	-1.62989	0.077147	-3.75964	0.000312082	0.00178141	-0.188039
ASPN	2.27391	3.81804	3.75675	0.000315178	0.00179635	-0.197279
IER5L	1.06618	3.13556	3.75658	0.000315365	0.00179638	-0.197833
MAP1LC3A	-1.30773	2.64271	-3.75494	0.00031714	0.00180576	-0.203087
ZNF354C	-1.34646	0.751162	-3.75314	0.0003191	0.00181475	-0.208855
VEGFA	1.06879	6.5799	3.7516	0.000320775	0.00182354	-0.213755
CD1E	-1.95358	-0.0367164	-3.75009	0.000322443	0.00183156	-0.218607
ZNF813	-1.72551	0.757587	-3.74856	0.000324132	0.00183968	-0.223497
TMEM71	-1.32637	0.0298093	-3.74772	0.000325056	0.00184419	-0.226162
TIGIT	1.55953	2.08279	3.74613	0.000326827	0.00185202	-0.231245
GLRB	-1.8421	-0.882636	-3.74586	0.000327136	0.00185303	-0.23213
GCNT3	-2.50312	2.07151	-3.74464	0.000328501	0.00185928	-0.236026
MATN3	1.70819	0.725657	3.74296	0.000330386	0.00186846	-0.241381
ZDHHC2	-1.48394	2.71703	-3.74145	0.000332092	0.00187711	-0.2462
IL24	2.2915	2.53669	3.73911	0.000334758	0.00189018	-0.253679
LYPD1	1.51938	1.27685	3.73795	0.000336086	0.00189617	-0.257385
TMEM200B	1.20822	2.10362	3.73669	0.000337523	0.00190277	-0.261376
MC1R	1.04731	1.07662	3.73652	0.000337723	0.00190314	-0.261929
JAM2	-1.30286	2.20619	-3.73606	0.000338251	0.00190536	-0.26339
BGN	1.51298	8.30432	3.72796	0.000347722	0.00195298	-0.289222
KHDC1	1.04829	0.588575	3.72513	0.000351087	0.00196986	-0.298228
CARD11	1.46494	2.98103	3.72437	0.000351995	0.00197417	-0.300645
SYNM	-1.5158	3.96901	-3.7212	0.000355801	0.00199159	-0.310701
ZFP3	-1.41569	1.53254	-3.72089	0.000356187	0.00199296	-0.311715
PPFIBP2	-1.11861	4.75442	-3.7203	0.000356903	0.0019954	-0.313592
NPBWR1	2.36217	-0.463648	3.7171	0.000360802	0.00201403	-0.323753
ACP5	1.00528	6.21394	3.71524	0.00036309	0.00202442	-0.329664
LETM2	1.26252	1.66286	3.71201	0.000367087	0.00204331	-0.339898
SYNPO2	-2.22676	3.79689	-3.71193	0.000367198	0.00204331	-0.340181
BEND6	1.28369	1.29061	3.70987	0.000369767	0.002056	-0.346697
TMEM170B	-1.20205	0.760255	-3.70816	0.000371922	0.00206475	-0.35213
ZNF563	-1.13654	0.342084	-3.70783	0.000372342	0.00206627	-0.353185
MAGI2	-1.15948	0.754123	-3.70764	0.000372576	0.00206667	-0.353771
DLX5	1.74996	2.81735	3.70754	0.000372705	0.00206667	-0.354096
KCNJ11	-1.77386	-0.501453	-3.70706	0.000373313	0.00206924	-0.355619
ZNF570	-1.2466	1.11685	-3.70223	0.000379474	0.00209368	-0.370919
RBP1	1.474	6.06017	3.70096	0.000381114	0.00210019	-0.374949
CILP2	2.11713	0.609016	3.69982	0.000382584	0.00210747	-0.378546
GAMT	-1.53017	3.24324	-3.69917	0.000383435	0.00210899	-0.380624
KRT16	2.74633	11.7337	3.69753	0.000385564	0.0021192	-0.385799
TRIL	-1.93247	1.29167	-3.6975	0.000385607	0.0021192	-0.385902
SNX31	-2.4806	-1.04018	-3.69723	0.000385957	0.0021203	-0.38675
CAMK2B	-2.11311	-0.122504	-3.69549	0.000388242	0.00213203	-0.392266
DEGS2	-2.28981	2.06637	-3.69414	0.00039002	0.00213931	-0.396535
DPT	-2.0538	2.6153	-3.68946	0.000396244	0.00217011	-0.411329
BEX2	-2.18876	0.841725	-3.6876	0.00039874	0.00218125	-0.417196
OGN	-2.79869	-0.0952711	-3.68662	0.000400064	0.00218741	-0.420292
KRT36	-2.39656	-2.58962	-3.68402	0.000403602	0.0022053	-0.428518
FOXP3	1.48749	2.38943	3.68355	0.000404242	0.0022071	-0.429997
CENPK	1.02924	2.26163	3.68195	0.000406437	0.00221739	-0.435056
ATP6V1B1	-2.55165	-0.826026	-3.68053	0.000408385	0.00222545	-0.439522
C4orf48	1.2517	0.431269	3.67968	0.000409562	0.00223101	-0.442209
PPP1R14C	1.21985	5.71654	3.67606	0.000414599	0.00225326	-0.453626
GARNL3	-1.01646	1.397	-3.67481	0.000416346	0.00226189	-0.457552
EPHB6	-1.74101	3.545	-3.67366	0.00041797	0.00226898	-0.461189
ACHE	-1.85791	0.457858	-3.67069	0.000422173	0.00229005	-0.470531
PDZD4	-1.40176	0.906824	-3.6698	0.000423451	0.00229348	-0.473354
KLHDC8A	-1.7049	-0.986245	-3.66943	0.000423973	0.00229455	-0.474503
CMYA5	-2.67014	2.5276	-3.66879	0.000424887	0.00229863	-0.476515
H2AC8	1.30959	0.460457	3.66563	0.000429446	0.0023207	-0.48648
MFSD4A	-2.34081	0.670585	-3.66562	0.000429456	0.0023207	-0.486503
ZNF667	-1.59765	-0.722034	-3.66548	0.00042966	0.00232091	-0.486944
NTN4	-1.39075	3.52332	-3.66434	0.000431317	0.00232721	-0.490538
RGMA	-1.69177	4.35515	-3.66278	0.000433583	0.00233855	-0.49543
SERTAD4	-1.46968	3.0867	-3.66216	0.000434487	0.00234194	-0.497375
UPP1	1.42346	6.41863	3.66166	0.000435219	0.00234471	-0.498947
C17orf97	-1.3393	0.404697	-3.66128	0.000435775	0.00234681	-0.500137
FCGBP	-2.27636	4.21841	-3.66117	0.000435941	0.00234681	-0.500493
MSC	1.47036	3.46757	3.6575	0.000441358	0.00237238	-0.512021
FN3K	-1.46447	1.6097	-3.65539	0.000444494	0.00238653	-0.518629
FA2H	-2.08989	0.987163	-3.65097	0.00045116	0.00241775	-0.532522
FAM13C	-1.63186	0.204941	-3.64392	0.000461964	0.00246728	-0.554605
WNT5B	-1.56024	2.49406	-3.64314	0.000463178	0.00247283	-0.557053
INAVA	1.05749	5.62567	3.64244	0.000464261	0.00247769	-0.559233
RPE65	3.05912	-0.0959444	3.63817	0.000470958	0.00251154	-0.572596
BAG2	1.23782	2.73602	3.63635	0.000473851	0.00252507	-0.578307
EPHX1	-1.16303	6.07891	-3.63385	0.000477832	0.00254247	-0.586112
CPEB4	-1.01994	5.27741	-3.63347	0.000478439	0.00254475	-0.587296
AFAP1L1	1.14256	4.26067	3.63208	0.000480673	0.00255568	-0.591641
RND1	-1.55431	0.969931	-3.62654	0.000489677	0.00259772	-0.608949
ACVR1C	1.31006	1.74376	3.62552	0.000491357	0.00260566	-0.612144
SBK1	-1.78415	0.94259	-3.62469	0.000492721	0.00261125	-0.614729
SEC14L6	-1.81526	-2.17	-3.62465	0.000492779	0.00261125	-0.614838
ETV1	-1.4612	2.13277	-3.62312	0.000495313	0.0026237	-0.619622
ZNF345	-1.30518	0.178002	-3.62093	0.000498948	0.00264099	-0.62644
MST1R	1.20584	4.52443	3.61969	0.000501028	0.00264904	-0.630319
MYLK4	-1.49522	0.263544	-3.61784	0.000504133	0.00266248	-0.636078
CD302	-1.17591	1.17607	-3.61651	0.000506381	0.00267137	-0.640226
CD200R1	-1.40475	0.0819741	-3.61636	0.000506633	0.00267172	-0.640691
LHFPL2	1.00642	5.20376	3.61587	0.000507464	0.0026751	-0.642218
SDC1	1.26663	10.2014	3.61502	0.000508909	0.00267974	-0.644868
IFIH1	1.23003	5.66438	3.61434	0.000510073	0.00268487	-0.646998
PCDH7	1.6781	5.86033	3.61379	0.00051101	0.00268881	-0.648709
RNF207	-1.13395	1.31415	-3.61237	0.000513428	0.00269853	-0.65311
FADS1	1.3501	4.9328	3.60801	0.00052096	0.00272603	-0.666686
IL36G	2.75793	3.86389	3.60784	0.000521256	0.00272657	-0.667215
PTGER3	-1.94194	1.27793	-3.60393	0.000528098	0.0027581	-0.679368
H2BC11	1.36582	1.03423	3.60387	0.000528193	0.0027581	-0.679537
SH3BP5	-1.16507	2.12961	-3.60332	0.000529179	0.00276191	-0.681274
ABCA1	1.0201	5.76723	3.60057	0.000534042	0.00278423	-0.689798
BASP1	1.39978	5.74813	3.60001	0.00053504	0.00278841	-0.691538
FIBCD1	1.75134	-1.02058	3.59649	0.000541357	0.00281514	-0.702476
MMP2	1.58208	7.76204	3.59582	0.000542566	0.00282039	-0.704554
TNNC2	-3.3218	0.239159	-3.59148	0.000550455	0.00285097	-0.718003
MLIP	-1.78998	1.21386	-3.59083	0.000551639	0.0028556	-0.720003
ZBTB7C	-2.29213	4.15383	-3.59055	0.000552165	0.00285671	-0.720892
SOX5	-1.58089	-0.342154	-3.58786	0.000557112	0.0028802	-0.729201
PLA2G7	1.5763	2.55007	3.58713	0.000558467	0.00288511	-0.731463
BCL2	-1.02386	2.73889	-3.58638	0.00055986	0.00289125	-0.733783
OBSCN	-1.48157	4.43525	-3.58259	0.000566955	0.00292576	-0.745512
KRTAP1-1	-1.37814	-3.9614	-3.57666	0.000578232	0.00297317	-0.763854
NREP	1.15503	5.04539	3.57489	0.000581634	0.00298527	-0.769316
KHDRBS3	-1.51854	1.65371	-3.57489	0.000581637	0.00298527	-0.769321
ACAA2	-1.09942	3.68805	-3.57458	0.000582238	0.0029862	-0.770282
PTPN20	-2.31762	-1.15957	-3.57393	0.000583495	0.00299157	-0.772291
PDCD1LG2	1.76708	2.09765	3.57285	0.000585599	0.00300127	-0.775641
TMEM98	-1.04439	3.9869	-3.57171	0.000587808	0.00301047	-0.779148
NAT8L	-1.85933	-0.87862	-3.56824	0.000594608	0.00304306	-0.789855
ZFP82	-1.2527	-0.215435	-3.56721	0.00059663	0.00305121	-0.793015
DMD	-1.63514	3.24426	-3.56626	0.000598515	0.00305975	-0.795952
CYP4F8	-1.67297	-3.40466	-3.55768	0.000615763	0.00313889	-0.822394
SGCG	-2.50389	-1.43901	-3.55708	0.000616983	0.00314398	-0.824237
NSUN7	-1.92152	-0.116986	-3.55498	0.000621285	0.00316024	-0.830703
THSD7B	-2.14713	-1.12677	-3.55365	0.000624024	0.00317195	-0.834796
CILP	-2.70277	0.291625	-3.55361	0.000624107	0.00317195	-0.83492
WNK4	-1.70865	-0.810897	-3.55353	0.000624258	0.00317195	-0.835145
GNLY	1.99283	3.01054	3.54949	0.000632648	0.00320999	-0.847566
MEOX2	-1.87333	-0.516644	-3.5472	0.00063746	0.0032321	-0.854617
ZNF486	-1.4629	0.36382	-3.54455	0.000643053	0.00325813	-0.862742
CCDC146	-1.2684	1.26942	-3.54299	0.000646377	0.00327148	-0.867539
ACKR3	1.44528	5.69602	3.5422	0.000648071	0.0032781	-0.869973
MYBPC1	-4.40453	0.262633	-3.54216	0.000648146	0.0032781	-0.870081
FAAH	-1.01658	2.84579	-3.5356	0.000662304	0.00334019	-0.890179
STBD1	-1.15814	0.511965	-3.53509	0.000663438	0.00334461	-0.891769
C2CD4C	1.46815	-0.309319	3.53499	0.000663651	0.00334461	-0.892068
ARHGAP44	-1.27543	0.964304	-3.53444	0.000664857	0.00334832	-0.893757
H3C4	1.4472	-0.312574	3.53427	0.000665224	0.00334898	-0.894269
PIK3C2G	-2.47793	-0.241762	-3.53225	0.000669651	0.00336769	-0.900438
EPPK1	1.74741	6.19094	3.53214	0.000669901	0.00336775	-0.900784
MB	-3.37069	2.14276	-3.53151	0.000671294	0.00337229	-0.902716
DGAT2	-1.87195	3.98095	-3.53104	0.000672335	0.00337402	-0.904156
F2RL2	1.6917	2.53408	3.53093	0.000672584	0.00337408	-0.9045
SLC39A4	1.06007	4.41062	3.52986	0.000674951	0.00338476	-0.907768
MYL3	-2.52211	-1.35221	-3.52627	0.000682967	0.00342254	-0.918745
IFIT3	1.91009	5.82236	3.52508	0.000685645	0.00343354	-0.922383
SLIT3	-1.77513	3.81008	-3.52458	0.000686787	0.00343805	-0.92393
PCDHGA2	-1.38634	-0.340672	-3.51993	0.000697348	0.00348478	-0.938115
BCL11B	1.00452	4.70405	3.51556	0.000707444	0.00352779	-0.951475
MFAP4	-1.96463	3.57551	-3.5102	0.000719979	0.00357774	-0.967796
SP140	1.48098	1.2768	3.50838	0.000724302	0.00359671	-0.973359
NLRP7	2.37917	-0.835153	3.50825	0.000724611	0.00359699	-0.973756
HERC5	1.42702	3.45286	3.50439	0.000733829	0.00363207	-0.9855
PIP5K1B	-1.60744	-0.206753	-3.50433	0.000733978	0.00363207	-0.985689
NUP62CL	1.02531	0.812086	3.50369	0.000735502	0.00363834	-0.987615
HOPX	-1.87822	5.82224	-3.50104	0.00074192	0.00366753	-0.995686
ZNF571	-1.2238	0.332185	-3.49952	0.000745625	0.00368457	-1.00031
STEAP1B	2.15659	1.08794	3.4993	0.00074615	0.00368588	-1.00097
ZNF595	-1.08666	1.41742	-3.49906	0.000746758	0.0036876	-1.00172
ABCA9	-1.40352	-0.322548	-3.4977	0.000750091	0.00369892	-1.00586
FREM1	-1.75018	-0.586025	-3.49542	0.000755695	0.0037201	-1.01277
HECW1	1.45217	0.508174	3.49283	0.000762128	0.00374399	-1.02065
CEACAM19	1.44681	4.39515	3.49238	0.000763245	0.00374818	-1.02201
BLACAT1	1.34787	1.13894	3.49215	0.000763829	0.00374975	-1.02272
ADM	1.15335	6.4043	3.49107	0.000766515	0.00376164	-1.02598
SLC9A2	-2.07856	0.242976	-3.48875	0.000772343	0.00378762	-1.03301
CAP2	-1.18298	3.01613	-3.48806	0.000774088	0.00379226	-1.03511
SOSTDC1	-2.93482	0.450131	-3.48754	0.00077541	0.00379538	-1.03669
ZBED2	1.76477	3.85938	3.48676	0.000777401	0.00380194	-1.03907
SMTNL2	-2.10122	-1.09442	-3.48443	0.000783332	0.00382699	-1.04613
APOBEC2	-2.84257	-1.38601	-3.48282	0.000787455	0.00384449	-1.051
CLDN3	-2.5855	-1.4784	-3.48216	0.000789156	0.00385147	-1.053
TRABD2B	-1.58555	0.145166	-3.48194	0.000789724	0.00385292	-1.05367
KBTBD11	-1.29611	0.608631	-3.4813	0.000791373	0.00385604	-1.05561
DTNA	-1.88967	0.993078	-3.47764	0.000800883	0.00388914	-1.0667
ERVMER34-1	1.45561	2.78037	3.4776	0.000800978	0.00388914	-1.06681
PRAME	3.50245	0.182084	3.47702	0.000802498	0.00389403	-1.06857
STX19	-1.69115	0.574984	-3.477	0.000802533	0.00389403	-1.06861
PSORS1C1	1.37507	1.00907	3.47603	0.000805092	0.00390511	-1.07156
LRRK2	-1.50253	2.18135	-3.47496	0.000807904	0.00391741	-1.0748
ACSBG1	-1.92199	-1.26594	-3.47353	0.000811679	0.00392767	-1.07913
KY	-1.96083	-1.48176	-3.47178	0.000816315	0.00394474	-1.08441
FRMPD1	-2.02121	-1.12813	-3.4716	0.000816787	0.00394489	-1.08495
FZD4	-1.02773	3.09542	-3.46891	0.000823963	0.00397764	-1.09307
ZNF461	-1.0207	0.722725	-3.46702	0.000829059	0.00399952	-1.09879
SV2B	-1.86394	-0.627971	-3.46593	0.000832018	0.00400971	-1.10209
RARRES1	-2.17001	2.41234	-3.46526	0.000833833	0.00401574	-1.10411
INPP5J	-1.41851	1.3461	-3.46512	0.000834198	0.00401613	-1.10452
CLEC11A	1.18362	2.86627	3.46447	0.00083598	0.00402335	-1.1065
THBS2	1.62993	7.19426	3.46435	0.000836288	0.00402347	-1.10684
EPB41L3	-1.03553	3.88065	-3.46141	0.000844339	0.00406083	-1.11573
SUSD4	-1.78974	3.72111	-3.46081	0.000845965	0.0040659	-1.11752
EGF	-2.06818	-0.465348	-3.45963	0.00084922	0.00407878	-1.12108
KRT5	1.49444	13.6241	3.45938	0.000849918	0.00408075	-1.12184
SCARF2	1.37439	2.52469	3.45883	0.000851441	0.00408669	-1.1235
QRICH2	-1.25209	0.410995	-3.45658	0.000857689	0.00411251	-1.13028
SMAD9	-1.30302	1.0341	-3.45625	0.000858615	0.00411417	-1.13128
ICOS	1.54014	0.992259	3.45453	0.000863412	0.00413159	-1.13645
ZNF608	-1.33017	2.23116	-3.4543	0.000864058	0.00413328	-1.13715
EMILIN1	1.55855	4.90223	3.45306	0.000867543	0.00414487	-1.14088
NLRP10	2.10932	-0.857841	3.45196	0.000870638	0.00415637	-1.14418
CDCP1	1.0511	7.23394	3.45004	0.000876074	0.00417671	-1.14995
COL22A1	2.31422	1.81182	3.44975	0.000876897	0.00417923	-1.15083
SLC16A4	-1.33246	0.203513	-3.44938	0.000877973	0.00418065	-1.15196
WARS1	1.63894	8.42701	3.44835	0.000880902	0.00419129	-1.15505
SRPK3	-2.13423	-0.501035	-3.44423	0.000892737	0.00424334	-1.16743
NFE2L3	1.04576	3.99279	3.44099	0.000902171	0.00428245	-1.17717
KLK1	-2.32472	1.34152	-3.43719	0.000913332	0.00432503	-1.18857
C15orf62	-1.55588	1.74812	-3.43703	0.000913807	0.00432503	-1.18905
PDE1C	-1.39615	-0.698429	-3.43587	0.000917252	0.0043381	-1.19254
FLT1	1.00112	4.69708	3.43417	0.000922303	0.00435698	-1.19763
C3orf18	-1.14702	0.608185	-3.4338	0.000923417	0.00435855	-1.19875
HOXA5	1.51127	-0.0152797	3.43123	0.000931101	0.00439191	-1.20643
FRMD3	-1.27452	0.303104	-3.42263	0.000957332	0.00449623	-1.23217
EYA1	-1.91006	-1.01228	-3.42113	0.000961998	0.00451218	-1.23668
TMEM150B	1.36585	-0.385851	3.41994	0.000965674	0.00452644	-1.24021
SYTL5	-2.08696	-0.0367405	-3.41803	0.000971665	0.00455002	-1.24594
ATP2A1	-2.81407	0.631425	-3.41493	0.000981419	0.00459267	-1.25519
FUT2	-1.42226	4.5247	-3.41466	0.000982269	0.00459513	-1.25599
EDNRB	-1.32337	1.95266	-3.41331	0.000986542	0.00461057	-1.26001
ABCA12	2.3011	5.01536	3.41252	0.000989069	0.00461934	-1.26238
SYPL2	-2.14178	-0.717383	-3.41051	0.000995496	0.00464478	-1.26838
CYP3A5	-1.9518	0.413814	-3.41014	0.000996686	0.0046488	-1.26949
LNX1	-1.21501	3.1634	-3.40863	0.00100154	0.00466837	-1.27399
PDZRN3	-1.5343	3.26894	-3.40639	0.00100879	0.00469448	-1.28067
FAM110B	-1.36547	1.02551	-3.40628	0.00100914	0.00469457	-1.28099
EMP1	-1.35125	8.33703	-3.40598	0.00101012	0.00469756	-1.28188
CDH6	1.13895	1.50179	3.4045	0.00101492	0.0047153	-1.28628
TRAPPC6A	-1.01063	2.93985	-3.40438	0.00101532	0.00471558	-1.28664
SEMA6C	-1.26388	2.24949	-3.40059	0.00102779	0.00476573	-1.29794
HOMER2	-1.2619	5.05458	-3.39799	0.0010364	0.00479937	-1.30566
SOST	2.14236	-0.783984	3.39787	0.00103679	0.00479962	-1.30601
LYZ	-2.09302	6.58111	-3.39755	0.00103788	0.0048031	-1.30699
CARNS1	-1.49541	-0.0669568	-3.39407	0.00104954	0.00485076	-1.31733
PIEZO2	1.41791	1.30009	3.39134	0.00105877	0.00488866	-1.32543
DISP2	1.70847	1.15773	3.39035	0.00106214	0.004901	-1.32837
ZNF577	-1.05337	0.76796	-3.38937	0.00106548	0.00491324	-1.33128
DSG3	1.93175	9.66621	3.38851	0.00106843	0.00492526	-1.33384
DUSP1	-1.24026	8.04497	-3.38835	0.00106896	0.00492598	-1.33429
IGFBP5	-1.55896	7.20989	-3.3878	0.00107086	0.00493163	-1.33593
ZNF506	-1.22294	2.15295	-3.38754	0.00107176	0.0049342	-1.33672
SLC16A14	-1.45672	1.79306	-3.38681	0.00107426	0.00494251	-1.33887
EFNA5	-1.09675	4.19985	-3.38597	0.00107714	0.00495256	-1.34135
NYNRIN	-1.27248	4.16016	-3.38085	0.00109496	0.00502766	-1.35653
MYOM2	-1.99463	1.02221	-3.38062	0.00109579	0.00502766	-1.35723
NKX2-3	-2.14327	-2.16019	-3.38012	0.00109754	0.00503168	-1.35871
EPHA7	-2.29038	-1.77195	-3.37888	0.00110189	0.00504662	-1.36237
ALDH1A3	-1.59185	4.25333	-3.37796	0.00110514	0.00505837	-1.36509
AGR2	-2.32559	3.06442	-3.37434	0.00111803	0.00511078	-1.37582
SYT8	-2.19836	2.08686	-3.37353	0.00112094	0.00512082	-1.37822
TMOD1	-1.94249	0.782278	-3.37115	0.00112949	0.0051549	-1.38525
COL8A1	1.85249	4.1631	3.36911	0.00113687	0.00518525	-1.39127
AKAP6	-1.55008	2.56992	-3.36826	0.00113998	0.0051961	-1.3938
ANXA8L1	1.22981	5.01587	3.36608	0.00114795	0.00522236	-1.40024
TLX1	-2.57136	-2.26235	-3.36538	0.0011505	0.00523136	-1.40229
CSRNP3	-1.5651	0.106813	-3.36106	0.0011665	0.00529319	-1.41506
TSHZ3	1.17813	3.51047	3.35986	0.00117096	0.00530497	-1.41859
STC1	1.31905	4.16203	3.35912	0.00117372	0.00531438	-1.42076
CLCN4	-1.57127	0.851791	-3.35699	0.00118171	0.00534515	-1.42704
SLC17A9	1.41535	1.42698	3.3554	0.00118772	0.00536721	-1.43173
AWAT1	-1.65241	-3.82581	-3.35444	0.00119138	0.00538205	-1.43457
HTRA1	1.17954	6.86588	3.35192	0.00120096	0.00541843	-1.44197
IDO1	2.55413	3.41958	3.35003	0.00120823	0.00544948	-1.44755
CYP2R1	-1.29818	2.28924	-3.34881	0.0012129	0.00546711	-1.45112
TUBB2B	-1.31099	1.61708	-3.34815	0.00121545	0.00547513	-1.45306
LAG3	1.56944	2.12341	3.34544	0.00122598	0.00551732	-1.46103
ZNF154	-1.12539	-0.475645	-3.33587	0.00126385	0.00567517	-1.48913
CALHM5	1.29819	2.24388	3.33444	0.00126962	0.00569744	-1.49333
MYLK	-1.10765	5.76452	-3.33421	0.00127055	0.00569983	-1.49401
TEX9	-1.0938	0.979206	-3.33364	0.00127285	0.00570656	-1.49568
BEX5	-1.73073	-0.837951	-3.33288	0.0012759	0.00571843	-1.49789
VCAN	1.77742	6.27442	3.33277	0.00127636	0.00571869	-1.49823
SCARA5	-1.80365	1.97203	-3.33236	0.00127804	0.00572141	-1.49944
KLHL31	-1.54975	0.119577	-3.33212	0.00127898	0.00572141	-1.50012
RAB3B	1.83775	0.818613	3.33078	0.00128443	0.00574396	-1.50404
CYP2E1	-2.07793	0.242753	-3.32997	0.00128777	0.00575526	-1.50644
GHR	-1.33512	2.22155	-3.32937	0.00129021	0.00576258	-1.50819
BMERB1	-1.0822	2.26071	-3.32733	0.00129857	0.00579806	-1.51415
SFN	1.54586	11.3061	3.32627	0.00130293	0.00581387	-1.51725
LAD1	1.23311	8.88488	3.32254	0.00131843	0.00587201	-1.52817
CXCL8	1.82755	5.30289	3.32115	0.00132423	0.0058923	-1.53222
CYP7B1	-1.53527	1.80684	-3.31911	0.00133284	0.00592132	-1.5382
CXCL17	-2.55647	3.64696	-3.31838	0.00133593	0.00592923	-1.54034
ADAMDEC1	2.10657	1.40471	3.31826	0.00133642	0.00592923	-1.54068
CCDC102B	1.04257	0.917731	3.31501	0.00135024	0.00597806	-1.55017
SMIM10L2B	-1.15127	0.0501078	-3.31477	0.00135124	0.00598065	-1.55086
CDH11	1.73722	4.9368	3.31334	0.00135736	0.00599839	-1.55503
NR4A1	-1.45498	5.08194	-3.31029	0.00137051	0.00605085	-1.56392
MX2	1.50125	5.34451	3.30929	0.00137488	0.00606451	-1.56686
SLPI	-1.67325	8.32879	-3.30716	0.00138413	0.00610149	-1.57304
C1orf210	-1.25961	2.46677	-3.30704	0.00138465	0.00610191	-1.57339
ENO3	-2.27526	1.60463	-3.29906	0.00141996	0.00624203	-1.59662
TNFRSF8	1.26893	0.667813	3.29779	0.00142568	0.00626002	-1.60033
ZNF583	-1.1698	-0.305598	-3.29644	0.00143173	0.00628017	-1.60424
FGF2	-1.48906	1.15146	-3.29528	0.00143701	0.00629961	-1.60763
DBNDD1	-1.69792	2.85415	-3.29354	0.00144489	0.00632812	-1.61267
AWAT2	-1.75173	-3.74707	-3.28576	0.00148073	0.00646964	-1.63526
DGAT2L6	-1.69892	-3.89555	-3.28573	0.00148084	0.00646964	-1.63533
AMZ1	1.44482	-1.09869	3.28488	0.00148482	0.00648105	-1.63781
GPRC5C	-1.12108	3.90806	-3.2832	0.00149269	0.0065114	-1.64268
LAMA1	1.87049	2.5708	3.28231	0.00149683	0.00652744	-1.64523
PGR	-1.74201	-1.12906	-3.2819	0.00149876	0.00653184	-1.64642
LAMA4	1.24138	5.54207	3.28114	0.00150238	0.00654362	-1.64864
CLDN14	1.51638	-1.09082	3.27851	0.00151484	0.00659184	-1.65626
CSAG3	2.29964	-1.71873	3.27492	0.001532	0.00665833	-1.66664
FAM83D	1.1437	5.25144	3.2734	0.00153933	0.00668613	-1.67104
KRT23	-2.26326	4.25138	-3.27247	0.00154379	0.00669935	-1.6737
ANKRD23	-1.45338	-1.11676	-3.27057	0.00155304	0.00672511	-1.6792
MOGAT2	-2.19172	-2.40434	-3.26884	0.00156149	0.00675554	-1.68421
RDH16	1.83534	1.90188	3.26866	0.00156235	0.00675717	-1.68471
SDK1	1.29992	3.93971	3.2668	0.00157149	0.00678844	-1.69008
HK3	1.63242	1.60129	3.26381	0.00158629	0.00683578	-1.69872
CNGA1	-1.29669	0.797611	-3.26199	0.00159537	0.00687072	-1.70398
CTSF	-1.11864	3.94856	-3.26046	0.00160301	0.00689528	-1.70838
KRT4	-3.92452	5.3797	-3.26027	0.00160396	0.00689726	-1.70892
SCGB1A1	-2.47417	-2.31824	-3.25897	0.00161049	0.00691697	-1.71266
C3orf14	-1.52575	1.39159	-3.2579	0.00161589	0.00693388	-1.71575
DYRK1B	-1.15883	3.32159	-3.2565	0.00162296	0.00695694	-1.71977
ACP3	-1.59722	2.98382	-3.25645	0.00162322	0.00695694	-1.71991
DAPK2	-1.04149	2.72577	-3.25067	0.00165281	0.00706245	-1.73655
MEFV	1.60886	0.992245	3.25031	0.00165467	0.00706826	-1.73758
GK	-1.00572	2.6246	-3.25004	0.00165607	0.00707001	-1.73836
ESPL1	1.06496	4.29528	3.24963	0.00165817	0.00707474	-1.73953
LRRN2	-1.54698	-0.173834	-3.24916	0.00166061	0.007083	-1.74088
MOXD1	-1.67819	3.58821	-3.24894	0.00166176	0.00708365	-1.74152
OLR1	1.7929	2.08004	3.24734	0.00167008	0.00711487	-1.74612
HSPG2	1.02712	8.03567	3.24282	0.00169382	0.00720953	-1.75911
SMPX	-3.02776	-1.43256	-3.24256	0.0016952	0.00721324	-1.75986
ZNF711	-1.73746	1.02766	-3.24104	0.00170324	0.00724527	-1.76421
LMCD1	-1.15902	4.05534	-3.23584	0.00173105	0.00733453	-1.77911
COX6B2	1.44183	0.41646	3.23577	0.00173145	0.00733453	-1.77933
CDK20	-1.07265	1.00413	-3.23373	0.00174244	0.0073723	-1.78515
FOXC1	-1.18427	3.8911	-3.23261	0.00174852	0.00739149	-1.78835
NKX3-1	-1.28714	2.28897	-3.23082	0.00175828	0.00742607	-1.79347
SLAMF8	1.26298	3.31278	3.23067	0.00175912	0.00742739	-1.79391
SERPINB5	1.27678	8.89524	3.22861	0.00177042	0.00747065	-1.7998
MYH7B	-1.25307	-0.683156	-3.22775	0.00177516	0.00748623	-1.80226
HID1	-1.52176	2.36188	-3.2262	0.00178377	0.0075136	-1.80671
RELN	-1.73915	-0.0593798	-3.22506	0.00179005	0.00753114	-1.80994
NT5E	1.47479	4.98859	3.22491	0.0017909	0.00753249	-1.81038
FCGR3A	1.61463	4.54647	3.2198	0.00181956	0.00763836	-1.82498
TRPC6	1.06897	1.53878	3.21973	0.00181996	0.00763836	-1.82518
ANXA8	1.11092	5.89798	3.21785	0.0018306	0.00767447	-1.83054
LXN	-1.26903	2.04139	-3.21697	0.00183559	0.00768858	-1.83304
BTNL9	-1.54052	-0.119937	-3.21659	0.00183778	0.00769552	-1.83414
SGCA	-2.30236	-0.433134	-3.21551	0.00184395	0.00771136	-1.83722
FXYD2	-1.83774	-1.78136	-3.21545	0.00184428	0.00771136	-1.83738
PLA1A	-1.35787	-0.371645	-3.21268	0.00186018	0.00777099	-1.84528
TBX3	-1.02588	3.63266	-3.20735	0.00189115	0.00788646	-1.86045
KRTAP1-3	-1.18126	-4.13687	-3.20688	0.00189393	0.0078934	-1.8618
GZMB	1.53694	2.4533	3.20281	0.00191789	0.00797923	-1.87335
TFAP2E	1.35756	0.823701	3.20261	0.00191906	0.00798177	-1.87392
IFIT1	1.7209	5.24865	3.20193	0.00192316	0.00799646	-1.87587
CXCL2	-1.60836	1.66981	-3.20013	0.00193384	0.00803292	-1.88096
CADM1	-1.42857	3.05933	-3.19865	0.00194273	0.008059	-1.88518
COL21A1	-1.70617	0.892372	-3.19789	0.00194729	0.00807319	-1.88733
DSC3	1.26543	9.43737	3.19599	0.00195878	0.00810429	-1.89274
PDZD7	1.31939	-0.471498	3.19488	0.00196551	0.00812975	-1.89589
RPH3AL	-1.43346	1.93637	-3.19431	0.00196894	0.00813645	-1.89749
CST4	-2.10375	-2.91889	-3.19423	0.00196942	0.00813645	-1.89771
ADPRHL1	-1.37205	1.40982	-3.19328	0.00197522	0.00815093	-1.90041
NECAB1	-1.43608	-0.75367	-3.19296	0.00197715	0.00815652	-1.90131
SLC5A1	-2.37474	3.1265	-3.19236	0.00198084	0.00816701	-1.90302
SYNE4	-1.99367	-1.40444	-3.18849	0.00200462	0.00825549	-1.91398
L3MBTL4	-1.61461	1.11865	-3.18569	0.002022	0.00832224	-1.92191
COL17A1	1.50987	9.80619	3.18492	0.0020268	0.00833475	-1.92409
NRAP	-3.74884	-0.417998	-3.183	0.00203887	0.0083747	-1.92954
KRT83	-1.59459	-3.49575	-3.18162	0.00204755	0.00840062	-1.93343
AADAC	-2.14793	-1.21036	-3.18111	0.00205074	0.00841128	-1.93486
ZNF14	-1.19934	1.15918	-3.18078	0.00205282	0.00841627	-1.93579
ZNF704	-1.37644	3.02277	-3.17901	0.00206408	0.00845868	-1.94082
LRRC20	-1.18423	3.30741	-3.17486	0.00209055	0.00854989	-1.95251
ADGRF4	1.63414	4.26713	3.17445	0.00209318	0.00855575	-1.95367
FAT1	1.16557	7.98759	3.17279	0.00210394	0.00858984	-1.95837
[truncated: 481 more rows]
